# Supplementary material
Source: PubMed Central journal article supplement (PMC7682388)
Supplement: pnas.2011765117.sapp.pdf [file pnas.2011765117.sapp.pdf]

1

2

3 Supplementary Information for **Early life of Neanderthals**

4

5 Alessia Nava, Federico Lugli, Matteo Romandini, Federica Badino, David Evans, Angela  
6 H. Helbling, Gregorio Oxilia, Simona Arrighi, Eugenio Bortolini, Davide Delpiano,  
7 Rossella Duches, Carla Figus, Alessandra Livraghi, Giulia Marciani, Sara Silvestrini,  
8 Anna Cipriani, Tommaso Giovanardi, Roberta Pini, Claudio Tuniz, Federico Bernardini,  
9 Irene Dori, Alfredo Coppa, Emanuela Cristiani, Christopher Dean, Luca Bondioli, Marco  
10 Peresani, Wolfgang Müller, Stefano Benazzi

11

12

13 To whom correspondence may be addressed. Email: alessia.nava@uniroma1.it;  
14 federico.lugli6@unibo.it; marco.peresani@unife.it; w.muller@em.uni-frankfurt.de;  
15 stefano.benazzi@unibo.it

16

17

18 **This PDF file includes:**

19

20       Supplementary text S1 to S4

21       Figures S1 to S13

22       Tables S1 to S3

23       Legends for Datasets S1 to S3

24       SI References

25

26 **Other supplementary materials for this manuscript include the following:**

27

28       Datasets S1 to S3

29

30

31 **SUPPLEMENTARY INFORMATION TEXT S1: DENTAL MORPHOLOGY**

32

33 The deciduous dental sample here investigated consists of three Neanderthals and one  
34 Upper Paleolithic modern humans (UPMH) specimen.

35 Fig. S2 reports the surface rendering of the four teeth from high resolution  
36 microtomographic volumes, segmented with Avizo 9.2 (Thermo Fisher Scientific). High-  
37 resolution micro-CT images of Fumane 1 and 2 were obtained with a Skyscan 1172  
38 microtomographic system using isometric voxels of 11.98  $\mu\text{m}$  (Fumane 1 and Fumane 2)  
39 (see Benazzi et al (1) for details). High-resolution micro-CT images of Nadale 1 and  
40 Riparo Broion 1 were acquired with the Xalt micro-CT scanner using isometric voxels of  
41 18.4  $\mu\text{m}$  (see Arnaud et al (2) for details).

42 The Neanderthal specimen Nadale 1 is a lower right first deciduous molar (Fig. S1a),  
43 whose morphological description and morphometric analysis were provided by Arnaud et  
44 al (2). The taxonomical assessment of the Neanderthal tooth Fumane 1, a lower left  
45 second deciduous molar (Fig. S1b), was confirmed by metric data and non-metric dental  
46 traits (1), while the attribution of Fumane 2, an upper right lateral deciduous incisor (Fig.  
47 S1d), to modern human was based on mitochondrial DNA (3).

48 Riparo Broion 1 is an exfoliated upper right deciduous canine (Fig. S1c), heavily worn,  
49 with about one-fourth of the root preserved, which suggests an age at exfoliation at about  
50 11-12 years based on recent human standards (4). The tooth is characterized by a stocky  
51 crown, bulging buccally, and a distolingual projection of a lingual cervical eminence,  
52 ultimately producing an asymmetrical outline. Overall our data concur to align Riparo  
53 Broion 1 to Neanderthals.

54 Overall, considering the paucity of European human remains dating to the Middle to  
55 Upper Paleolithic transition, the dental sample here investigated represents a unique  
56 exception for 1) its provenance from a restricted region of northeast Italy, ultimately  
57 removing the geographical variable as a potential confounding factor for  
58 chemical/isotopic patterns, 2) being represented by deciduous teeth, thus allowing to  
59 evaluate diet and mobility during early infancy, 3) the presence of both late Neanderthal  
60 specimens (Fumane 1 and Riparo Broion 1) and one of the earliest modern humans in

61 Europe (Fumane 2), thus providing a unique opportunity to compare subsistence  
62 strategies between the two human groups around the time of Neanderthal demise.  
63

64 **SUPPLEMENTARY INFORMATION TEXT S2: ARCHAEOLOGICAL AND**  
65 **PALEOENVIRONMENTAL CONTEXTS**

66

67 Nadale 1

68 De Nadale Cave is a small cavity located 130m a.s.l. in the middle of the Berici Hills.  
69 Research at De Nadale Cave started in 2013 when a first excavation campaign led to the  
70 discovery of a cave entrance after the removal of reworked sediments. Later, six  
71 campaigns were carried out between 2014 and 2017 in order to investigate the deposits  
72 preserved in the cave entrance and the back (5). The excavations exposed a stratigraphic  
73 sequence which includes a single anthropic layer (unit 7) embedded between two sterile  
74 layers (units 6 and 8) partly disturbed by some badger's dens along the cave walls. Unit 8  
75 lays on the carbonate sandstone bedrock. Besides these disturbances, unit 7 is well  
76 preserved and extends into the cavity. It yielded thousands of osteological materials,  
77 lithic implements, and the Neanderthal deciduous tooth (2). A molar of a large-sized  
78 ungulate was U/Th dated to 70,200±1,000/900 years as a minimum age (5) placing the  
79 human occupation to an initial phase of the MIS 4. The zooarchaeological assemblage is  
80 largely ascribable to human activity (6). Neanderthals hunted and exploited mainly three  
81 taxa: the red deer (*Cervus elaphus*), the giant deer (*Megaloceros giganteus*) and bovids  
82 (*Bison priscus* and *Bos primigenius*) (6, 7), in association with other taxa consistent with  
83 the paleoclimatic and paleoenvironmental reconstruction based on the small mammal  
84 association, where the prominence of *Microtus arvalis* identifies a cold climatic phase  
85 and correlates to a landscape dominated by open woodlands and meadows (8). A large  
86 amount of anthropic traces is observed on the ungulate remains, ascribable to different  
87 stages of the butchery process and to the fragmentation of the bones for marrow  
88 extraction. Burnt bone fragments and charcoal accumulations have been likely related to  
89 residual fire-places (6). Lithic industry from of De Nadale differentiates technologically  
90 and typologically from the Mousterian elsewhere in the region, especially with regard to  
91 the core reduction methods and the types of flakes and retouched tools. These are  
92 represented from several scrapers with stepped-scaled invasive retouches and make the

93 De Nadale industry comparable to Quina assemblages in Italy and Western Europe (5).  
94 De Nadale peculiarity is also enhanced by the high number of bone retouchers (9).  
95 Research at the De Nadale Cave is coordinated by the University of Ferrara (M.P.) in the  
96 framework of a project supported by the Ministry of Culture – “SABAP per le province  
97 di Verona, Rovigo e Vicenza” and the Zovencedo Municipality, financed by the H.  
98 Obermaier Society (2015), local private companies (R.A.A.S.M., Saf and Lattebusche),  
99 and local promoters.

100

#### 101 Fumane 1 and 2

102 Grotta di Fumane (Fumane Cave) is a cave positioned at the western fringe of the Lessini  
103 plateau in the Venetian Pre-Alps. The site preserves a finely layered late Middle and early  
104 Upper Paleolithic sequence with evidence of cultural change related to the demise of  
105 Neanderthals and the arrival of the first Anatomically Modern Humans (3, 10-12). Teeth  
106 Fumane 1 and Fumane 2 were found in Middle Paleolithic unit A11 and Upper  
107 Paleolithic unit A2 associated to Mousterian and Aurignacian cultures respectively.

108 Of the late Mousterian layers, unit A11 is a stratigraphic complex composed of an  
109 ensemble of thin levels with hearths that was surveyed in different years at the eastern  
110 entrance of the cave over a total area of 10 sqm. The chronometric position of A11 is  
111 provided by only one U/Th date to  $49,000 \pm 7,000$  years for level A11a, given unreliability  
112 to the radiocarbon dataset currently available (13) but see (14). New radiocarbon  
113 measurements are in progress. Paleoecological indexes calculated on the composition of  
114 the micromammal assemblage point for a temperate and relatively moist period related to  
115 an interstadial before HE5 (15), in a landscape dominated from open-woodland  
116 formations in accordance with the previous indications based on the zooarchaeological  
117 assemblage. Cervids (red deer, giant deer and roe deer) largely prevail on bovids and  
118 caprids (ibex and chamois) and other mammal species (16). No taphonomic analyses  
119 have still been conducted to confirm the anthropogenic nature of the accumulation of the  
120 animal bone remains. Lithic artifacts belong to the Levallois Mousterian. The use of this  
121 technology is recorded by high number of flakes, cores and by-products shaped into

122 retouched tools like single and double scrapers, also transverse or convergent and few  
123 points and denticulates (11).

124 Aurignacian layer A2 records an abrupt change in material culture represented from lithic  
125 and bone industry (10, 17, 18), beads made of marine shells and bone (10, 19), use of red  
126 mineral pigment (20). Bone and cultural remains have been found scattered on a  
127 paleoliving floor with fire-places, toss zones and intentionally disposed stones (21). A  
128 revised chronology of the Mid-Upper Paleolithic sequence (14) has shown that the start  
129 and the end of level A2 date respectively to 41,900-40,200 cal BP and 40,300-39,400 cal  
130 BP at the largest confidence interval. Macro- and micro-faunal remains show an  
131 association between forest fauna and cold and open habitat species typical of the alpine  
132 grassland steppe above the tree line in a context of climatic cooling (15, 22, 23). Hunting  
133 was mostly targeted adult individuals of ibex, chamois and bison and occurred  
134 seasonally, from summer to fall (22, 24).

135 Research at Fumane is coordinated by University of Ferrara (M.P.) in the framework of a  
136 project supported by the Ministry of Culture – “SABAP per le province di Verona,  
137 Rovigo e Vicenza”, public institutions (Lessinia Mountain Community - Regional  
138 Natural Park, Fumane Municipality, BIMAdige, SERIT) and by private institutions,  
139 associations and companies. Research campaigns 2017 and 2019 have received funding  
140 from the European Research Council (ERC) under the European Union’s Horizon 2020  
141 research and innovation programme (grant agreement No 724046 – SUCCESS,  
142 <http://www.erc-success.eu>).

#### 143 Riparo Broion 1

144 The Berici Mounts are a carbonatic karst plateau at low altitude at the southern fringe of  
145 the Venetian Pre-Alps in the Alpine foreland. This is a large alluvial plain that was  
146 formed initially during the Middle and Late Pleistocene by a number of major rivers,  
147 including the Po, the Adige and those of the Friulian-Venetian plain. The western zone of  
148 the Berici is a gentle landscape which conjoins to the alluvial plain. Conversely, along its  
149 eastern slope the plateau connects abruptly to the alluvial plain. Here, caves and  
150 rockshelters have been archaeologically investigated since the XIX century up to present  
151 days by teams from the University of Ferrara. Of these cavities, Riparo del Broion is a

152 flagship site for the late Middle and early Upper Paleolithic in this area. It is situated at  
153 135m a.s.l. at the base of a steep cliff of Mount Brosimo (327 m a.s.l.) along a terraced  
154 slope for cultivation during recent historical times. The shelter is 10m long, 6m deep and  
155 17m high and originated from rock collapse along a major ENE-WSW oriented fault that  
156 developed from thermoclastic processes and chemical dissolution comparably to other  
157 cavities in the area (25, 26). Two additional Paleolithic cavities were investigated on the  
158 western side of the same cliff, Grotta del Buso Doppio del Broion and Grotta del Broion  
159 (27, 28).

160 The sedimentary deposits of Riparo Broion were partially dismantled in historical times  
161 by shepherds with use to store hay and wood. Further damage occurred in 1984 when  
162 unauthorized excavators removed sediments from pits and trenches on a total area of  
163 14sqm down to 2m at the deepest. Archaeological excavations were initially directed by  
164 Alberto Broglio (1998 -2008) and by two of us (M.P. and M.R.) in 2015 on a 20sqm area  
165 bounded to north and west from the rock walls. Faunal remains and Middle and Upper  
166 Paleolithic (Uluzzian, Gravettian and Epigravettian) cultural material was uncovered (29-  
167 31). The bedrock has not yet been reached. Sediments are mostly small stones and gravel  
168 with large prevalence on loams: 16 stratigraphic units planarly bedded have been  
169 identified. The lowermost (11, 9, 7 and 4) contain Mousterian artefacts, faunal remains  
170 and clearly differentiate in dark-brownish color from the other units.

171 The human canine was discovered in unit 11 top. This unit has been <sup>14</sup>C dated to  
172 48,100±3100 years BP with range from 50.000 to 45.700 years cal BP as the most likely  
173 age (31). Stone tools are too low in number to propose an attribution to one or another  
174 Mousterian cultural complex. Preliminary zooarchaeological data report a variety of  
175 herbivores such as elk, red deer, roe deer, megaceros, wild boar, auroch/bison, a few  
176 goats and horses, and common beaver associated sparse remains of fish and freshwater  
177 shells. This association reflects the presence of a patchy environmental context, with  
178 closed to open-spaced forests, Alpine grasslands and pioneer vegetation complemented  
179 by humid-marshy environments and low-energy water courses, wet meadows and shallow  
180 lacustrine basins.

181 Research at Riparo Broion is coordinated by the Bologna (M.R.) and Ferrara (M.P.)  
182 Universities in the framework of a project supported by the Ministry of Culture –  
183 “SABAP per le province di Verona, Rovigo e Vicenza”, public institutions (Longare  
184 Municipality), institutions (Leakey Foundation, Spring 2015 Grant; Istituto Italiano di  
185 Preistoria e Protostoria). Research campaigns 2017-2019 have received funding from the  
186 European Research Council (ERC) under the European Union’s Horizon 2020 research  
187 and innovation programme (grant agreement No 724046 – SUCCESS, [http://www.erc-  
188 success.eu](http://www.erc-success.eu)).

189

### 190 Paleoenvironmental contexts

191 The paleoenvironmental contexts during the time intervals of the teeth recovered at the  
192 sites of Nadale, Fumane cave and Riparo Broion (~ 70, 50 and 40 ka) can be inferred on  
193 the basis of two high-resolution paleoecologically records from NE-Italy: Lake Fimon  
194 (Berici Hills) and Palughetto basin (Cansiglio Plateau, eastern Venetian Pre-Alps). Pie  
195 charts presented in Fig. S3 show the relative abundances of different vegetation types at  
196 5000 years’ time-slice intervals. Pollen % are calculated based on the sum of terrestrial  
197 taxa and represent mean values. Pollen taxa are grouped according to their ecology and  
198 climatic preferences. Eurythermic conifers (EC): sum of *Pinus* and *Juniperus*; Temperate  
199 forest (TF): sum of deciduous *Quercus*, *Alnus glutinosa* type, *Fagus*, *Acer*, *Corylus*,  
200 *Carpinus*, *Fraxinus*, *Ulmus*, *Tilia* and *Salix*; Xerophytic steppe (XS): sum of *Artemisia*  
201 and *Chenopodiaceae*. Other herbs: sum of terrestrial herbs, *Chenopodiaceae* excluded.  
202 Original pollen data used for % calculation for the Palughetto basin are from (32).

203 On a long-term scale, the paleoecological record from Lake Fimon points to persistent  
204 afforestation throughout the Early to Middle Würm in the Berici Hills (i.e., Nadale,  
205 Fumane and Riparo Broion sites). Moderate forest withdrawals occurred during  
206 Greenland stadials (GSs), possibly enhanced during GSs hosting Heinrich Events (HEs)  
207 (33).

208 Between 75 and 70 ka, at the end of the second post-Eemian interstadial, the landscape  
209 was dominated by a mosaic of boreal forests with eurythermic conifers (46%) and



210 subordinated temperate taxa (10%). Open environments are identified by pollen of  
211 herbaceous taxa and steppe/desert forbes-shrubs (23%).  
212 During the 50-45 ka and 45-40 ka time-slices, steppic communities further increase (7-  
213 8%) as a result of enhanced dry/cold conditions during Greenland stadials (GSs). Pollen  
214 of eurythermic conifers sum up to 37-38%. Temperate trees, notably Tilia, persisted in  
215 very low percentages (4%) up to ~40 ka (34).  
216

217 **SUPPLEMENTARY INFORMATION TEXT S3: TOWARDS A CONCEPTUAL**  
218 **MODEL FOR Sr/Ca AND Ba/Ca BEHAVIOR IN HUMAN INFANTS:**  
219 **THEORETICAL FRAMEWORK AND EMPIRICAL EVIDENCE FROM**  
220 **CONTEMPORANEOUS INFANTS WITH KNOWN FOOD INTAKE**

221 Strontium and barium are non-bioessential trace elements with no major metabolic  
222 functions in the human body. Strontium and Ba mimic Ca, given their coherent behavior  
223 as alkaline earth elements with respect to their divalent charge, but are characterized by  
224 larger ionic radii (Sr: 1.18, Ba: 1.35, Ca: 1.00 Å ( $10^{-10}$  m)); (35). Overall, they both follow  
225 the Ca metabolism but due to their larger ionic size are discriminated against in the  
226 gastrointestinal tract (GIT) (36, 37). Given the larger size, Ba is even more strongly  
227 discriminated against relative to Sr (37, 38). Similarly, kidneys tend to excrete Sr and Ba  
228 more rapidly compared to Ca (39). From plasma, Sr, Ba and Ca are mainly fixed in bones  
229 and teeth with a likely further bias in favor of Ca (39, 40). Taken together, these factors  
230 cause Ca-normalized concentrations of Sr and Ba in skeletal tissues to be lower than  
231 those of the diet, a process known as ‘biopurification’ (36). Burton and Wright (41)  
232 demonstrated that Sr/Ca of bones is approximately 5 times lower than the respective  
233 Sr/Ca value of the diet. Such evidence has been also demonstrated empirically by many  
234 studies (36-38, 42, 43). These pioneering studies also emphasized that Sr/Ca and Ba/Ca  
235 might be used as tools for paleodiet and trophic chain reconstruction (36).

236 Interestingly, significant GIT discrimination of Sr and Ba over Ca ions progressively  
237 increases during human growth and becomes significant at around one year of age (44,  
238 45). This hints that both the Sr/Ca and Ba/Ca ratios of infant plasma (<1 year) should be  
239 closer to the value of their respective dietary inputs (46). Indeed, Lough et al (46)  
240 demonstrated that the relative ratio between body Sr/Ca and dietary Sr/Ca for an infant is  
241 ~0.90. Hence, for example, in breast-fed infants, the Sr/Ca of their blood plasma should  
242 reflect the Sr/Ca of the consumed breastmilk. Studies of elemental transport in humans  
243 have shown that Ca is actively transported (47), resulting in lower Sr/Ca ratios in both  
244 umbilical cord sera and breastmilk than in mother sera due to the larger size of Sr ions  
245 compared to Ca ions. Yet, empirical evidence indicates that mammary gland  
246 discrimination for Sr (2.5-fold) is higher than placenta (1.7-fold), yielding average

247 breastmilk Sr/Ca values lower than umbilical cord (fetal) values (48). Crucially, fetal  
248 blood chemistry is recorded in prenatal dental enamel and breastmilk consumption in  
249 postnatal enamel and can be reconstructed via high-spatial resolution chemical analysis of  
250 teeth (49, 50). Thus, higher Sr/Ca signals in prenatal domains followed by lower  
251 postnatal Sr/Ca indicate breastmilk consumption (see Fig. S4). This has been previously  
252 shown by the Sr/Ca distribution in teeth (50, 51), but also in elemental analyses of sera  
253 samples. Krachler et al. (52) showed that Sr/Ca levels are two times higher in umbilical  
254 cord sera than in breast-fed infant sera. On the other hand, due to the nominal lower  
255 trophic level of herbivores, their milk has higher Sr/Ca than human milk. Hence, when a  
256 child is fed through formula (largely based on cow milk), a Sr/Ca increase in the  
257 postnatal enamel is expected (Fig. S4).

258 Indeed, Krachler et al. (52) reported high Sr/Ca values in formula-fed infant sera.  
259 Moreover, a compilation of published Sr/Ca data of geographically dispersed human and  
260 bovine/caprine milks (Fig. S5 and references in caption) indicates that human breastmilk  
261 has a rather homogeneous Sr/Ca ratio of  $\sim 0.1 \pm 0.01 \cdot 10^{-3}$ , 4 times lower than non-human  
262 milk and formula ( $\sim 0.39 \pm 0.15 \cdot 10^{-3}$ ).

263 From all these inferences, the Sr/Ca ratio of both breast-fed and formula-fed infants can  
264 be modelled relative to an initial Sr/Ca mother diet, set equal to 1 (Tab. S2 and Fig. S4).  
265 With the introduction of transitional food in the infant diet, a change in Sr/Ca values is  
266 also expected. If the child was initially breast-fed, one should predict an increase of the  
267 Sr/Ca ratio during transitional feeding, because both meat and especially vegetables  
268 retain higher Sr/Ca than breastmilk (see e.g. 53). In general, an increased Sr/Ca signal  
269 from transitional foods is also expected for formula-fed babies. However, due to the  
270 compositional variability of some formulas (e.g. soy-based) and non-human milk, a  
271 decrease of the Sr/Ca ratio may occur if a highly-biopurified food (e.g. close to human  
272 milk) is used for initial weaning.

273 Contrary to strontium, a reliable interpretation of Ba/Ca data is difficult due to  
274 contradictory literature and the lack of studies on Ba metabolism. Austin et al. (54)  
275 suggested that the increased level of both Sr/Ca and Ba/Ca ratios in breast-fed infants  
276 reflected improved Sr and Ba absorption during breastfeeding. Such an increase in Sr/Ca

277 is in stark contrast to any other study on breastfed children (49, 50). Similarly, Krachler  
278 et al. (55) highlighted increased levels of Ba/Ca in colostrum and breast-fed infant sera  
279 compared to umbilical cord sera (Tab. S3). However, colostrum is not a good proxy for  
280 breastmilk elemental content, being highly enriched in metals (56, 57). In fact, when  
281 compared with Sr/Ca and Ba/Ca ratios from literature, colostrum values reported in  
282 Krachler et al. (55) are about 2 times higher than other human milk samples (Figure S5).  
283 Moreover, other studies suggested that only a very limited portion of the absorbed Ba  
284 (~3%) is transferred to the breast-milk (48).

285 Studies of dental enamel indicate that Ba overall behaves akin to Sr (50, 53, 58, 59),  
286 decreasing with breastmilk consumption and increasing along with the introduction of  
287 transitional food. Still, Müller et al. (50) noted that Ba behavior in tooth enamel is less  
288 predictable than Sr. This observation may also relate to the high variability of Ba content  
289 in human milk, colostrum and formulas (see (55) and Fig. S5). Notably, Taylor et al. (60)  
290 pointed out that in controlled-fed rats, the consumption of cow milk leads to an increase  
291 of Ca absorption, without changing the Ba absorption. This, in turn, corroborates the idea  
292 that the relative Ba/Ca ratio in rats should decrease with a milk-based diet and increase  
293 with a non-milk diet. In the same publication, the authors reported that Ba absorption  
294 increased two-fold in young starved rats, whereas Ca absorption decreased in the same  
295 individuals, pointing towards an association of Ba/Ca with dietary stress rather than  
296 weaning transitions.

297 Around one year of age, both Ba/Ca and Sr/Ca gradually decrease due to the progressive  
298 increase in GIT discrimination in the infant due to a preferential absorption of Ca relative  
299 to Sr and Ba (44, 45). Taken together, we conclude that models for Sr/Ca with respect to  
300 dietary transitions in early life have a stronger theoretical basis compared to Ba.

301

### 302 The modern reference sample

303 In the following we present spatially-resolved chemical data from contemporaneous  
304 individuals with known dietary behavior to evaluate the theoretical framework presented  
305 above. To avoid the problem of retrospectively reporting breastfeeding and weaning  
306 practice (61), we selected offspring from parents who reliably took and preserved notes

307 of the feeding practice during the nursing period (explicit written consent was obtained  
308 by all relevant people with legal authority). All individual data were treated in a fully  
309 anonymous way and it is not possible from the present results to identify the involved  
310 individuals.

311 Three deciduous teeth, representing three different nursing histories, were analyzed by  
312 LA-ICPMS: an exclusively breastfed individual from Switzerland (deciduous second  
313 molar dm2; MCS1), an exclusively bottle-fed individual from central Italy (deciduous  
314 canine dc; MCS2 previously published as MOD2 in (50)), a mixed breast-/bottle-fed  
315 individual from central Italy (deciduous canine dc; MCS3). The mothers of the three  
316 infants did not travel for extended periods during the interval in which these deciduous  
317 teeth were forming.

318 MCS1 is a lower deciduous second molar from an individual exclusively breastfed until  
319 the fifth month of life (154 days; Fig. S6). No supplementary food was given to the infant  
320 during this period. The Sr/Ca profile analyzed parallel to the enamel-dentine junction  
321 (EDJ) shows a constant decrease in the elemental ratio until ~154 days corresponding to  
322 the reported period of exclusive breastfeeding. Just after the introduction of solid food  
323 once a day (reported from day 155), the slope of the profile becomes gradually shallower,  
324 particularly, this was coincident with the introduction of some formula milk (reported  
325 from day 182). Fifteen days after cutting down breastfeeding during daytime (reported on  
326 day 209) the profile begins to show a sharp increase of the Sr/Ca values. At 8.5 months of  
327 life (reported on 258 days) the breastfeeding period of individual MCS1 stopped and the  
328 diet continued with solid food and formula milk. The rather flat Sr/Ca signal observed in  
329 the last part of the profile (after day ~340) likely reflects the effects of maturation-  
330 overprint due to the thin enamel closest to the crown neck (50). The striking  
331 correspondence of the independently recorded dietary transitions in MCS1 with the Sr/Ca  
332 trend fully supports the use of Sr/Ca as a proxy for making nursing events. In this sense,  
333 based on modelled values reported in Tab. S2, the theoretical ratio between Sr/Ca in  
334 prenatal enamel and breastfeeding signal is ~0.7. In MCS1, this ratio is ~0.8, indicating a  
335 remarkable correspondence between the theoretical model and the observed data. The  
336 MCS1 Ba/Ca profile broadly follows the trend observed for Sr/Ca, decreasing - with

337 proportionately smaller changes in Ba levels across lifetime - from birth until ~160 days.  
338 Thereafter, Ba/Ca steadily increases till day 235, steeply increases until day ~290 (9.5  
339 months) to then decrease again for 25 days. Finally, Ba/Ca constantly increases to the end  
340 of the crown formation. This fluctuation in the last part of the profile cannot be explained  
341 by any event in the known dietary/health history of MCS1.

342 MCS2 is a deciduous canine from an exclusively formula-fed individual (Fig. S7), whose  
343 results have already been partially presented in the context of enamel mineralization  
344 processes as MOD2 (50). The Sr/Ca profile, run parallel to the EDJ, shows a constant  
345 increase after birth until ~130 days (~4.3 months), and then it starts to decrease as a  
346 consequence of the combined effects of the onset of the reported transitional period and  
347 maturation overprint. The absolute values of Sr/Ca through all the postnatal period are  
348 higher than  $5 \cdot 10^{-4}$  and thus higher than those observed in the other contemporary  
349 reference individuals (Figure S4b). The model reported in Fig. S4 and Table S2 specifies  
350 a ratio between prenatal enamel and formula Sr/Ca signal equal to ~2.2. In MCS2, this  
351 ratio is ~1.8, corroborating the hypothesis that with formula introduction the postnatal  
352 Sr/Ca should double. The Ba/Ca profile follows the same trend observed in the Sr/Ca  
353 profile, increasing from birth until ~75 days (2.5 months), then remaining stable with  
354 some fluctuation until ~175 days (5.8 months).

355 MCS3 is an upper deciduous canine from a mixed breast- formula-fed individual (Fig.  
356 S8). This infant was exclusively breastfed for the first 30 days. After that, the mother  
357 complemented the infant diet with formula milk. Mixed feeding was carried on until 4  
358 months of age, at which time the mother underwent surgery. During this period of illness,  
359 the mother used a breast pump to continue breastfeeding. After the surgery, the mother  
360 continued to breastfeed the infant with formula milk supplements, until the onset of  
361 weaning at six months.

362 The X/Ca profiles were nominally analyzed close to daily-resolution (6  $\mu\text{m}$  spots vs. 10.3  
363  $\mu\text{m}/\text{day}$  mean enamel extension rate), well-reflecting this complex nursing history and  
364 almost perfectly matching the main dietary shifts. Ba/Ca mirrors the Sr/Ca pattern,  
365 decreasing during the period of exclusive breastfeeding, slightly increasing during the  
366 mixed breast- bottle-feeding, and increasing further at the onset of weaning. The Ba/Ca

367 profile follows the main dietary shifts but with less precision than Sr/Ca. Moreover, as in  
368 MCS1, the period of exclusive breastfeeding is characterized by a sharp decrease in  
369 Ba/Ca, contrary to what expected by Austin et al. (54), that predict in their model  
370 increased levels of both Sr/Ca and Ba/Ca ratios in breast-fed infants. We note here that  
371 the small laser spot (6  $\mu\text{m}$ ) used during analysis resulted in lower ICPMS signals and  
372 hence overall larger analytical variability than for the other two specimens.

373

#### 374 The fossil Late Pleistocene human dental sample

##### 375 Nadale 1 - Neanderthal

376 In Nadale1, Sr/Ca profile slightly decreases until the end of the elemental profile,  
377 depicting a breastfeeding signal until the end of the crown formation. Unusually, Ba/Ca  
378 shows the opposite trend to Sr/Ca (Fig. S9) and appears to follow the dietary model  
379 proposed by (54), i.e. an increase in Ba/Ca. Mg/Ca is largely invariant across the whole  
380 crown, and only very minor diagenetic alteration is apparent via U peaks at the very  
381 beginning and end of the crown that have very limited correspondence in Ba/Ca and  
382 Sr/Ca.

383

##### 384 Fumane 1 - Neanderthal

385 In Fumane 1, the Ba/Ca profile broadly follows that of Sr/Ca (Fig. S10), yet especially  
386 for the first ~120 days displays several pronounced, narrow peaks that correlate positively  
387 with U and negatively with Mg, respectively. These reveal localized diagenetic overprint  
388 that is far less manifested for Sr/Ca. According to our model, Sr/Ca indicates an exclusive  
389 breastfeeding signal until 115 days (4 months), followed by the first introduction of non-  
390 breastmilk food and a stronger signal visible at 200 days (6.6 months), at which point  
391 there is a steep increase in Sr/Ca that likely indicates a more important and substantial  
392 introduction of supplementary food. This profile is fully comparable to the MCS1 pattern  
393 reported above. According to (54), this individual falls outside the bounds of their model,  
394 because a decrease in Ba/Ca after birth due to exclusive breastfeeding is never detected in  
395 their data (see above for an explanation of the Ba/Ca model reported in (54)).

396

397 Riparo Broion 1 - Neanderthal

398 In Riparo Broion 1, the Ba/Ca profile overall varies in parallel with the Sr/Ca one (Fig.  
399 S11), but also shows some prominent peaks that correlate positively with U and  
400 negatively with Mg, respectively, indicating, similar to Fumane 1, that U uptake and Mg  
401 loss are indicators of localized diagenetic alteration (see Figure 3 main text). Regardless  
402 of diagenesis, both elemental ratios vary in the same way. According to our contemporary  
403 reference sample, a decrease in the Sr/Ca ratio is a consequence of exclusive  
404 breastfeeding until 160 days (5 months), after which an increase in Sr/Ca points to the  
405 first introduction of non-breastmilk food. According to the Ba/Ca profile and following  
406 the model in (54), this individual should have been never breastfed.

407

408 Fumane 2 - Aurignacian

409 The Ba/Ca profile of Fumane 2 follows that of Sr/Ca (Fig. S12), slightly decreasing in the  
410 first month of postnatal life and then increasing in the most cervical enamel. The short  
411 postnatal portion of available enamel (~55 days) precludes the chemical detection of the  
412 onset of weaning but a clear breast-feeding signal is detectable after birth since Sr/Ca  
413 decreases. Ba/Ca also decreases accordingly, and all is independent of diagenesis that is  
414 very low. According to the Ba/Ca profile and following the model in (54), this individual  
415 was breastfed for the first time at ~1 months of age.

416



417 **SUPPLEMENTARY INFORMATION TEXT S4: ASSESSMENT OF POST-**  
418 **MORTEM DIAGENETIC ALTERATION OF BIOAPATITE**

419

420 In order to retrieve primary in-vivo elemental and isotopic signals from fossil teeth,  
421 preferably no alteration by post-mortem diagenetic processes should have taken place.  
422 During the post-depositional history, however, bioapatite may react with soils and  
423 underground waters, which can modify the initial biogenic chemical composition.  
424 Depending on apatite crystal-size, organic content and porosity, the distinct dental tissues  
425 behave differently in a soil environment. Bone and dentine are most susceptible to  
426 diagenetic chemical overprint, in contrast to highly-mineralized enamel (62-65). Equally,  
427 the extent of chemical overprint depends on the concentration gradient between burial  
428 environment and bioapatite tissue as well as the partition coefficient for the element(s)  
429 concerned.

430 While alkali-earth elements (e.g. Ba, Mg and Sr) and biologically-important divalent  
431 metals (e.g. Cu, Fe and Zn) are present at mid-high concentrations (i.e.  $>1 - 10^3 \mu\text{g/g}$ ) in  
432 modern bioapatite, Rare Earth Elements (REE), actinides and high-field strength  
433 elements (e.g. Hf, Th and U) have very low concentrations (lowest ng/g) in modern  
434 teeth/bones, yet are usually strongly incorporated into apatite during fossilization  
435 processes (66).

436 In particular, uranium as water soluble (as uranyl  $(\text{UO}_2)^{2+}$ ) and highly mobile element is  
437 readily incorporated into bioapatite (67, 68), such that uranium in fossil bioapatite,  
438 especially in bone and dentine, often shows high concentrations ( $>10\text{s} - 100\text{s} \mu\text{g/g}$ ),  
439 whereas enamel frequently displays much lower U concentrations (e.g. (69)). Given these  
440 variations at the microscale, uranium can reveal diagenetic overprint in tandem with Mn  
441 or Al. Conversely, some bio-essential trace elements in bioapatite such as Mg may  
442 decrease post-mortem due to precipitation of diagenetic phases with lower trace metal  
443 concentrations, incipient recrystallization or leaching from the dental/bone tissue (70, 71).  
444 To monitor diagenetic alterations of our fossil dental specimens, we monitored  $^{25}\text{Mg}$ ,  
445  $^{27}\text{Al}$ ,  $^{55}\text{Mn}$ ,  $^{89}\text{Y}$ ,  $^{140}\text{Ce}$ ,  $^{166}\text{Er}$ ,  $^{172}\text{Yb}$  and  $^{238}\text{U}$  signals during the LA-ICPMS analyses and  
446 found that U (and Al) were the most sensitive indicators of diagenetic alteration, while

447 commonly utilized REEs plus Y were rather insensitive in all cases as they remained at  
448 detection limit even in domains with clearly elevated U and Al. As a result, REE + Y are  
449 not shown here and we focus on U as main proxy for post-mortem diagenesis.

450 Scatter plots between U and the residuals of Sr, Ba or Mg variation for the diagenetically  
451 most affected segments (Fig. S13) illustrate well the nature of element-specific diagenetic  
452 overprint of the four teeth. In samples with overall low [U] ( $<0.2 \mu\text{g/g}$ ), i.e. Nadale 1 and  
453 Fumane 2, there are no significant positive or negative correlations discernible. In case of  
454 Riparo Broion 1 and Fumane 1, [U] rises up to  $0.6 \mu\text{g/g}$  and positively correlates with Ba  
455 and negatively with Mg, while Sr only shows significant co-variation in Riparo Broion 1.  
456 It should be noted that spatially-resolved analysis by LA-ICPMS not only allows the  
457 retrieval of time-resolved chemical signals, but is equally ideally-suited for the  
458 delineation of well-preserved segments in partially diagenetically-overprinted samples.

459

460 Overall, we employ the following strategy to delineate well-preserved from  
461 diagenetically overprinted segments in our enamel profiles. We stress that not a single  
462 threshold value but rather a combination of the following criteria help delineate  
463 diagenetically-overprinted from sufficiently well-preserved enamel domains:

464 1) The visible co-variation between U and Sr/Ca (Fig. 3) as well as above mentioned  
465 correlations between Sr, Ba, Mg residuals with U (Fig. S13) show that especially Ba and  
466 less so Sr (only Riparo Broion 1) were added during diagenesis, while Mg was lost.  
467 Consequently, data segments with lowest U – below which no correlation remains ([U]  
468  $<\sim 0.05 - 0.1 \mu\text{g/g}$ )- were used for further considerations. Incidentally, this 50 ppb [U]  
469 threshold also matches well the enamel [U]-values for omnivores and carnivores from the  
470 modern baseline study by (72).

471 2) The shape and nature of the discernible peaks/troughs provide an additional constraint.  
472 Very sharp variations, over less than 5 days, in U, Ba, Mg in Fumane 1 (Fig. S10) and U,  
473 Ba, Sr, Mg in Riparo Broion 1 (Fig. S11) characterize diagenetic signals, while variations  
474 in low-U domains are far more gradual and occur over tens of days. The latter is more in  
475 line with biologically-mediated variations that are additionally modulated by the  
476 protracted nature of enamel mineralization (50), which precludes, for example, the up to

477 fourfold variability in Ba/Ca occurring at the profile start of Fumane 1 to be of in-vivo  
478 origin (Fig. S10).

479 3) Diagenesis is highly sample-specific even at the same site, illustrated here for Fumane  
480 cave, which makes a 'one size fits all' approach difficult to apply. While Fumane 2 is  
481 almost not affected by diagenesis that does also not affect Ba or Mg, the only slightly  
482 older Fumane 1 sample is more strongly overprinted, which manifests itself especially in  
483 Ba addition (>twofold increase) and Mg loss, while Sr is little affected.

484

485 We note that diagenesis appears to affect the early formed enamel segments more than  
486 later mineralized areas. As the former are characterized by higher enamel extension rates,  
487 one conjecture is that this may have caused slightly greater amount of porosity that in  
488 turn makes such domains more susceptible for post-mortem chemical overprint. Thus, the  
489 initial portions of Nadale 1, Fumane 1 and Riparo Broion 1 crowns show enrichments in  
490 U, Al and Mn, with a concurrent decrease of Mg (Figure 3 and S9-S12). While Sr seems  
491 only partly affected by this overprint, Ba tends to precisely resemble the small-scale  
492 chemical fluctuations of the diagenetic proxies (clearly visible in Riparo Broion 1 and  
493 Fumane 1), suggesting a lack of post-burial stability for the latter element.

494 Taken together, we observe that the areas of interest (i.e. weaning onset) of our  
495 specimens are sufficiently free from diagenetic alterations to reliably deduce time-  
496 resolved dietary and mobility signals based on Sr/Ca and Sr isotopic ratios, respectively.

497

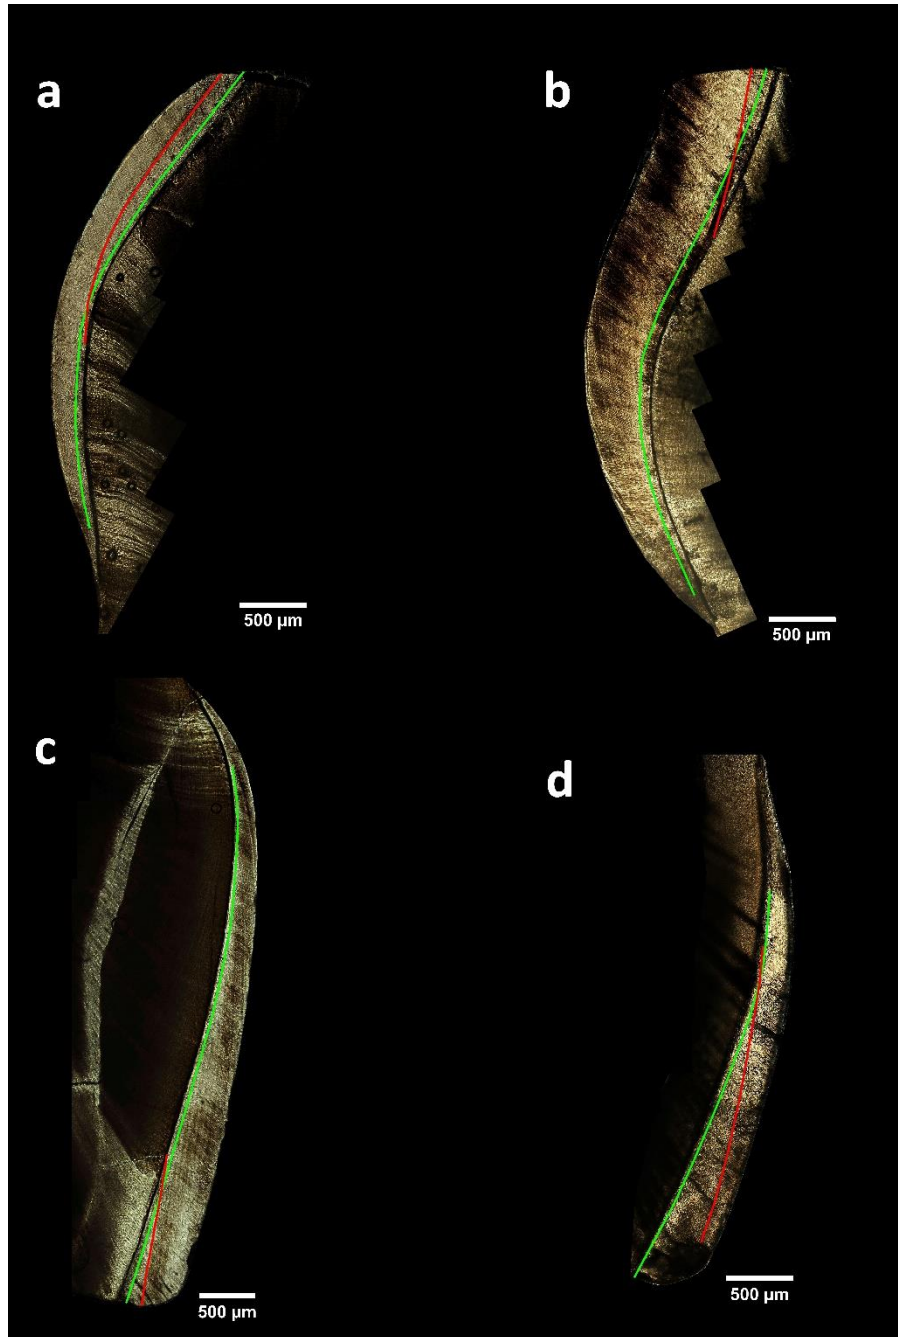

498

499 **Figure S1. Micrographs acquired at 100x magnification of the four exfoliated**  
500 **deciduous fossil teeth.** (a) Nadale 1, Neanderthal, lower right deciduous first molar,  
501 lingual aspect, the section pass through the metaconid; (b) Fumane 1, Neanderthal, lower  
502 left deciduous second molar, buccal aspect, he section pass through the hypoconid; (c)  
503 Riparo Broion 1, Neanderthal, upper left deciduous canine, buccal aspect; (d) Fumane 2,  
504 UPMH, upper right lateral deciduous incisor, buccal aspect. Red lines highlight the  
505 position of the Neonatal line marking birth event; green lines highlight the laser ablation  
506 paths.

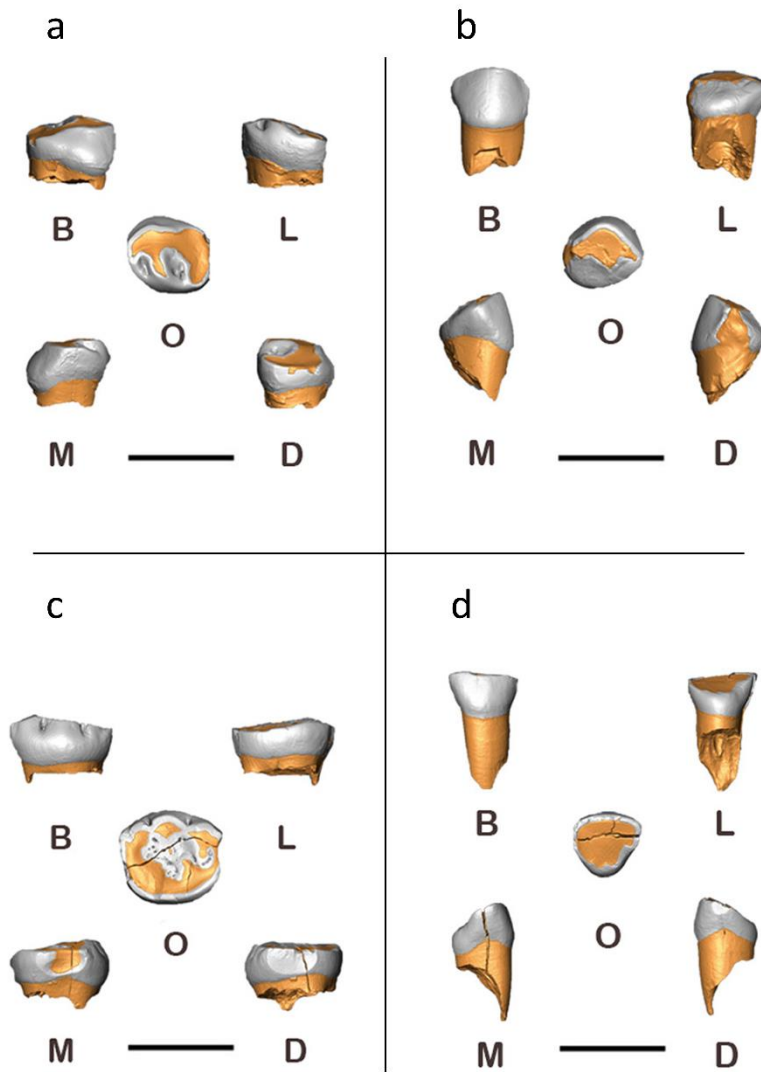

507

508 **Figure S2. Three-dimensional digital models of the four exfoliated deciduous fossil**  
 509 **teeth.** (a) Nadale 1 (lower right first deciduous molar); (b) Fumane 1 (lower left second  
 510 deciduous molar); (c) Riparo Broion 1 (upper right deciduous canine); (d) Fumane 2  
 511 (upper right lateral deciduous incisor). Scale bar 10 mm. B, buccal; D, distal; L, lingual;  
 512 M, mesial; O, occlusal

513

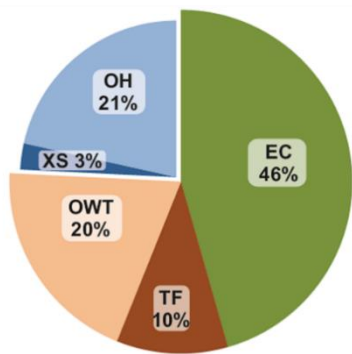

Fimon pollen record  
ca. 75-70 ka

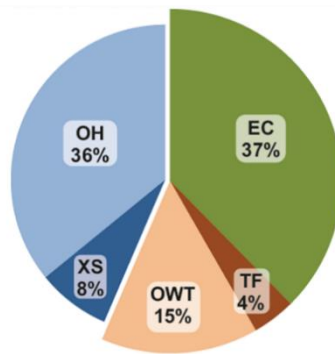

Fimon pollen record  
ca. 50-45 ka

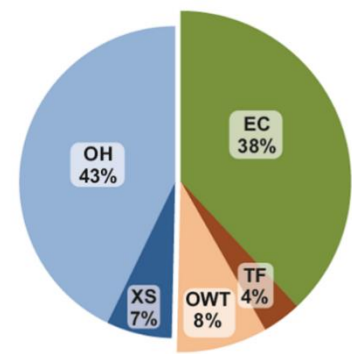

Fimon pollen record  
ca. 45-40 ka

514

515 **Figure S3. Pollen record summary of different vegetation types during selected**  
 516 **time-frames.** Pollen % are calculated based on the sum of terrestrial taxa and represent  
 517 mean values over the selected time frame. Taxa are grouped according to their ecology  
 518 and climatic preferences. Eurythermic conifers (EC): sum of *Pinus* and *Juniperus*;  
 519 Temperate forest (TF): sum of deciduous *Quercus*, *Alnus glutinosa* type, *Fagus*, *Acer*,  
 520 *Corylus*, *Carpinus*, *Fraxinus*, *Ulmus*, *Tilia* and *Salix*; Xerophytic steppe (XS): sum of  
 521 *Artemisia* and Chenopodiaceae; other herbs (OH): sum of terrestrial herbs; other woody  
 522 taxa (OWT) are also reported.

523

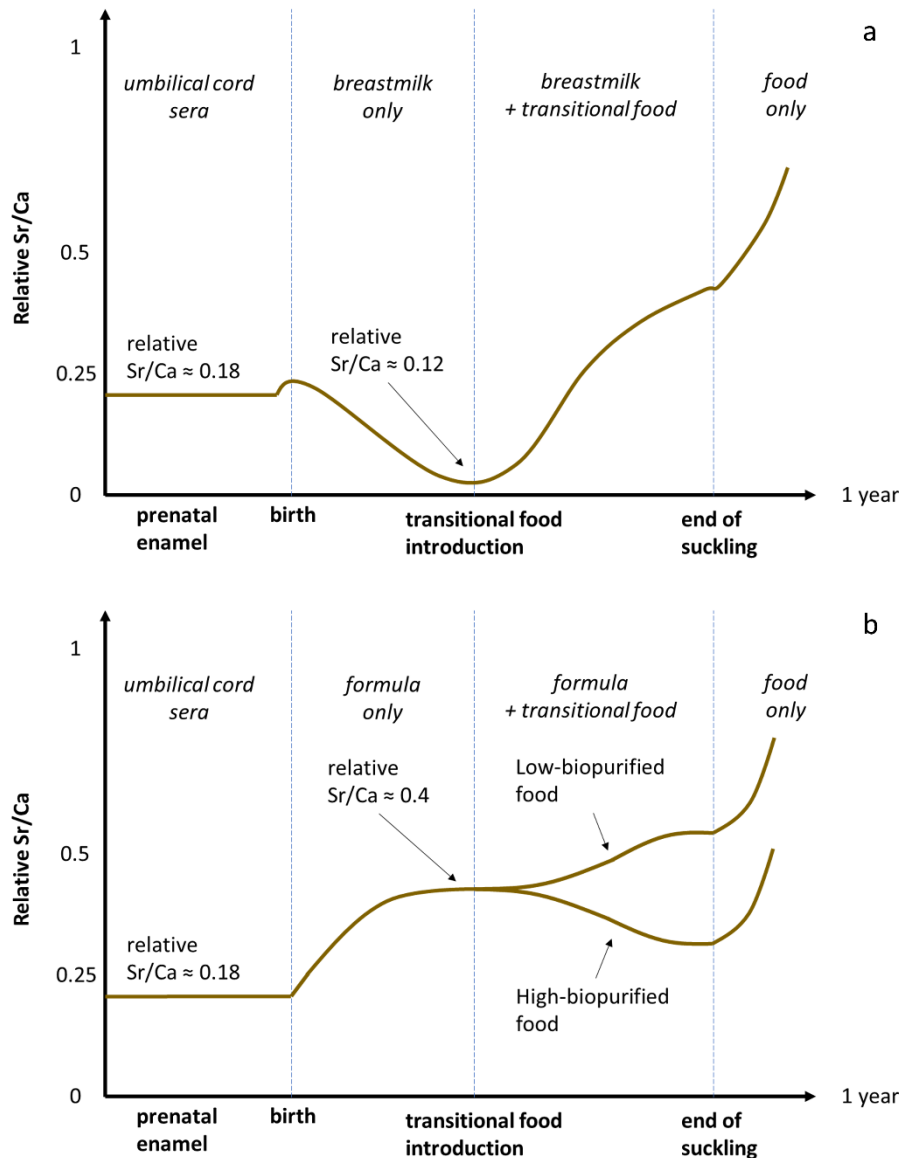

524  
 525 **Figure S4. Sr/Ca models for (a) breast-fed infants and (b) formula fed-infants.** These  
 526 models assume a mother diet equal to 1. In this model, GIT function is ignored since it  
 527 begins to significantly discriminate Sr over Ca at ~1 year of age in humans. A small peak  
 528 in Sr/Ca signal is visible across birth in breast-fed infants (a); this has been observed  
 529 empirically in our tooth samples and may relate to several factors, as e.g. high-metal  
 530 content of colostrum (57) or potential changes in perinatal physiology (56). The same  
 531 peak is probably masked in formula-fed infants (b) due to the rapid Sr/Ca increase.

532  
 533

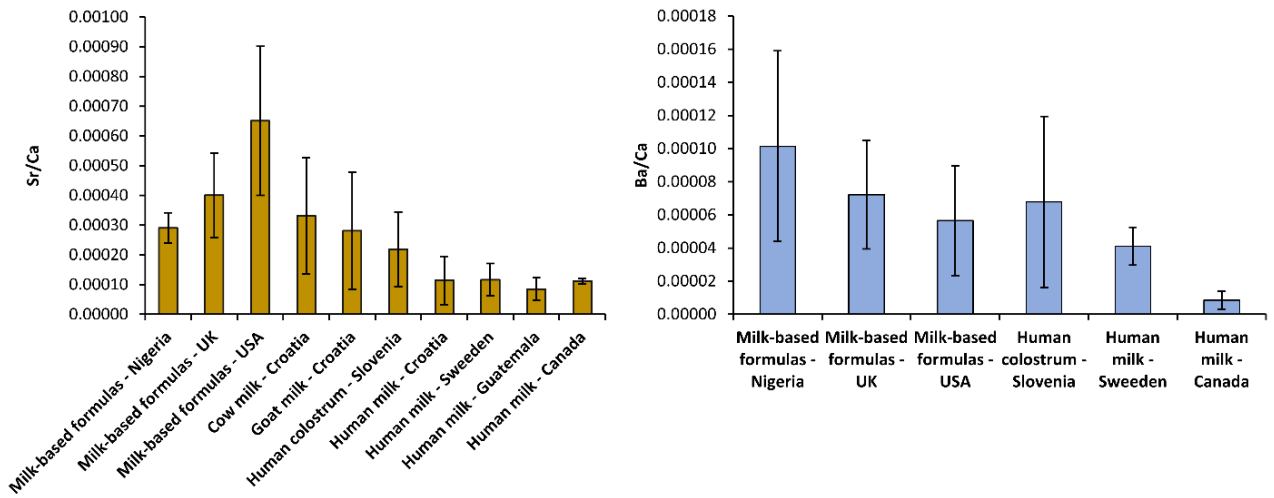

534  
535

536 **Figure S5. Sr/Ca and Ba/Ca data of animal milks, human milks and formulas from**  
 537 **literature.** Formulas are from Ikem et al. (73); cow and goat milks are from Bilandžić et  
 538 al. (74); human colostrum is from Krachler et al. (55); human milks are from Bilandžić et  
 539 al. (74), Björklund et al. (75), Li et al. (76) and Friel et al. (77). The geographical  
 540 provenance of the samples is also reported. Error bars are standard deviations.

541

542



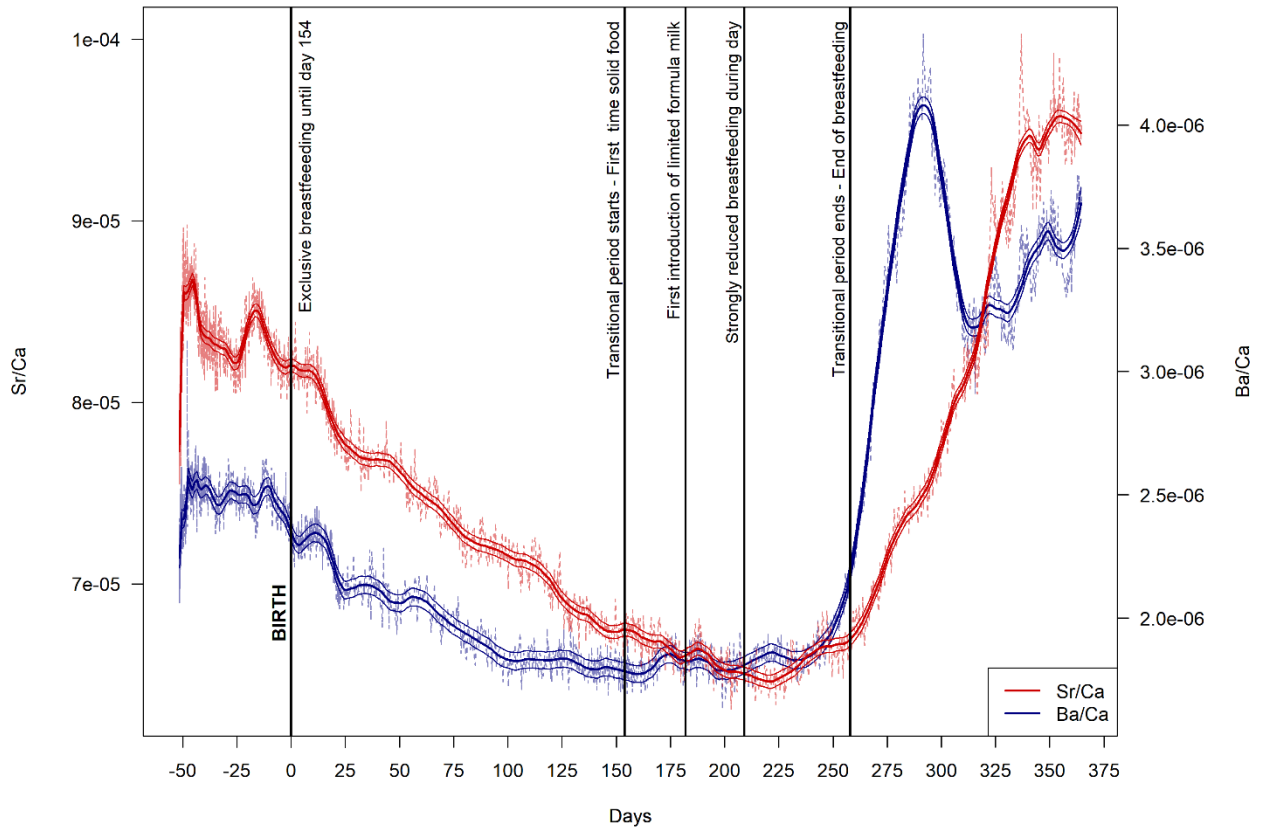

543

544 **Figure S6. Time-resolved Sr/Ca and Ba/Ca profiles in modern reference deciduous**  
 545 **teeth of the exclusively breastfed individual MCS1.** Deciduous second molar dm2; The  
 546 elemental profiles were analyzed within enamel closest to the enamel-dentine-junction  
 547 (EDJ).

548

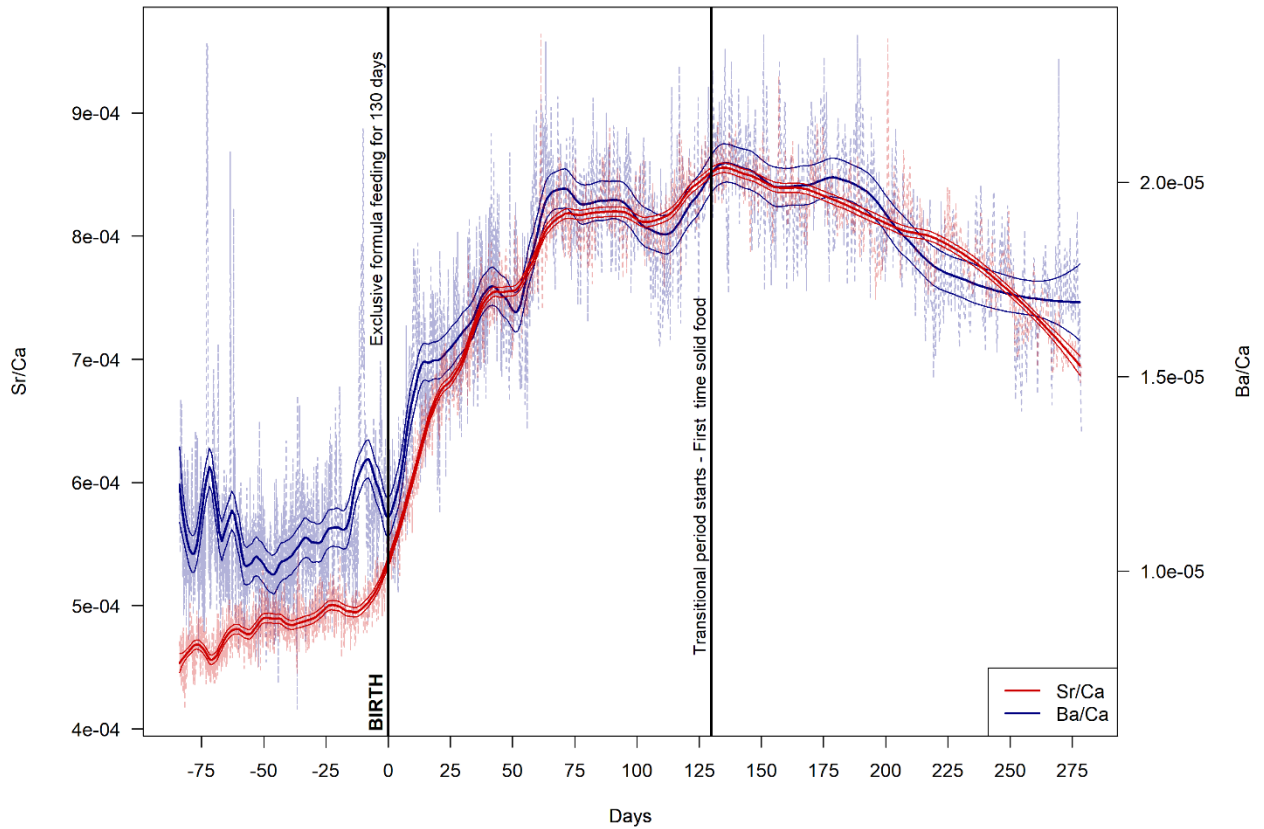

549

550 **Figure S7. Time-resolved Sr/Ca and Ba/Ca profiles in modern reference deciduous**  
 551 **teeth of the exclusively formula-fed individual MCS2.** Deciduous canine dc. The  
 552 elemental profiles were analyzed within enamel closest to the enamel-dentine-junction  
 553 (EDJ).

554

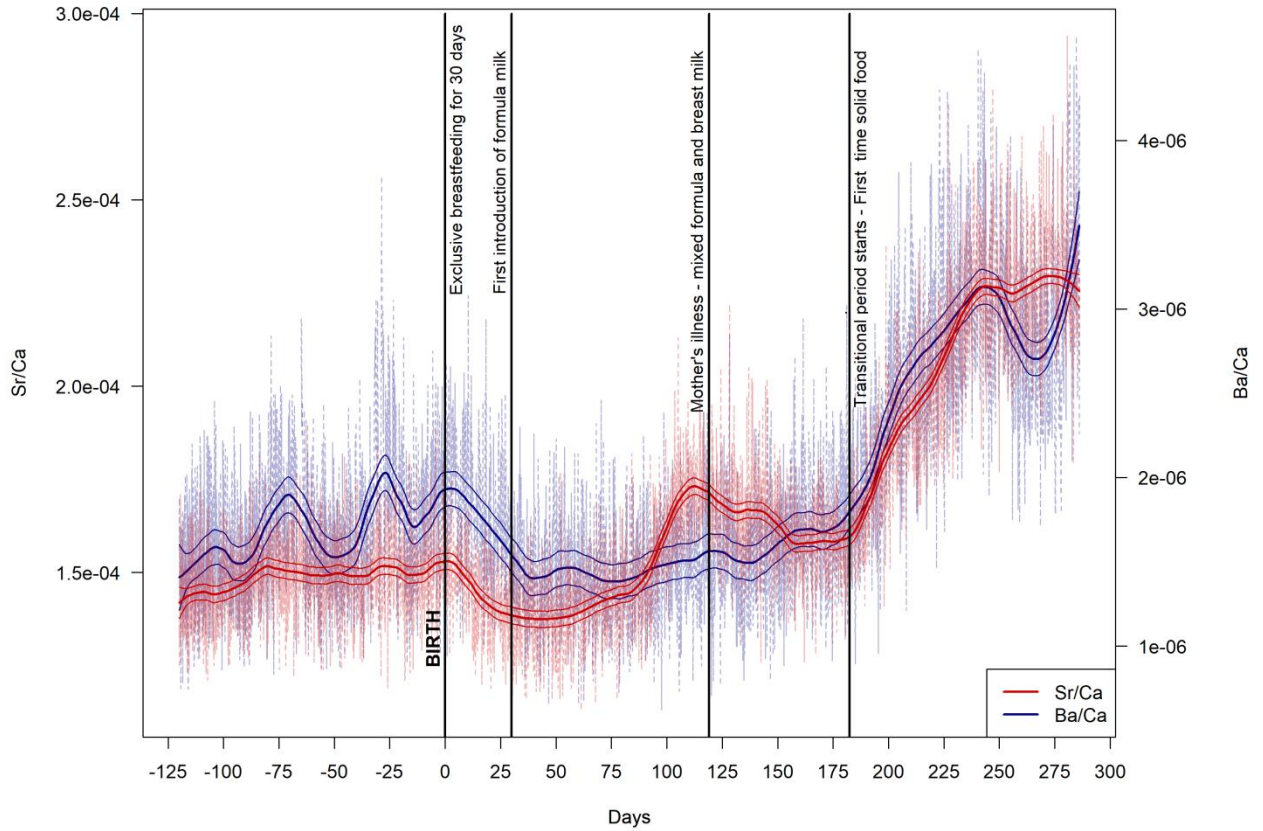

555

556 **Figure S8. Time-resolved Sr/Ca and Ba/Ca profiles in modern reference deciduous**  
 557 **teeth of the mixed breast- formula-fed individual individual MCS3. deciduous canine**  
 558 **dc. The elemental profiles were analyzed within enamel closest to the enamel-dentine-**  
 559 **junction (EDJ).**

560

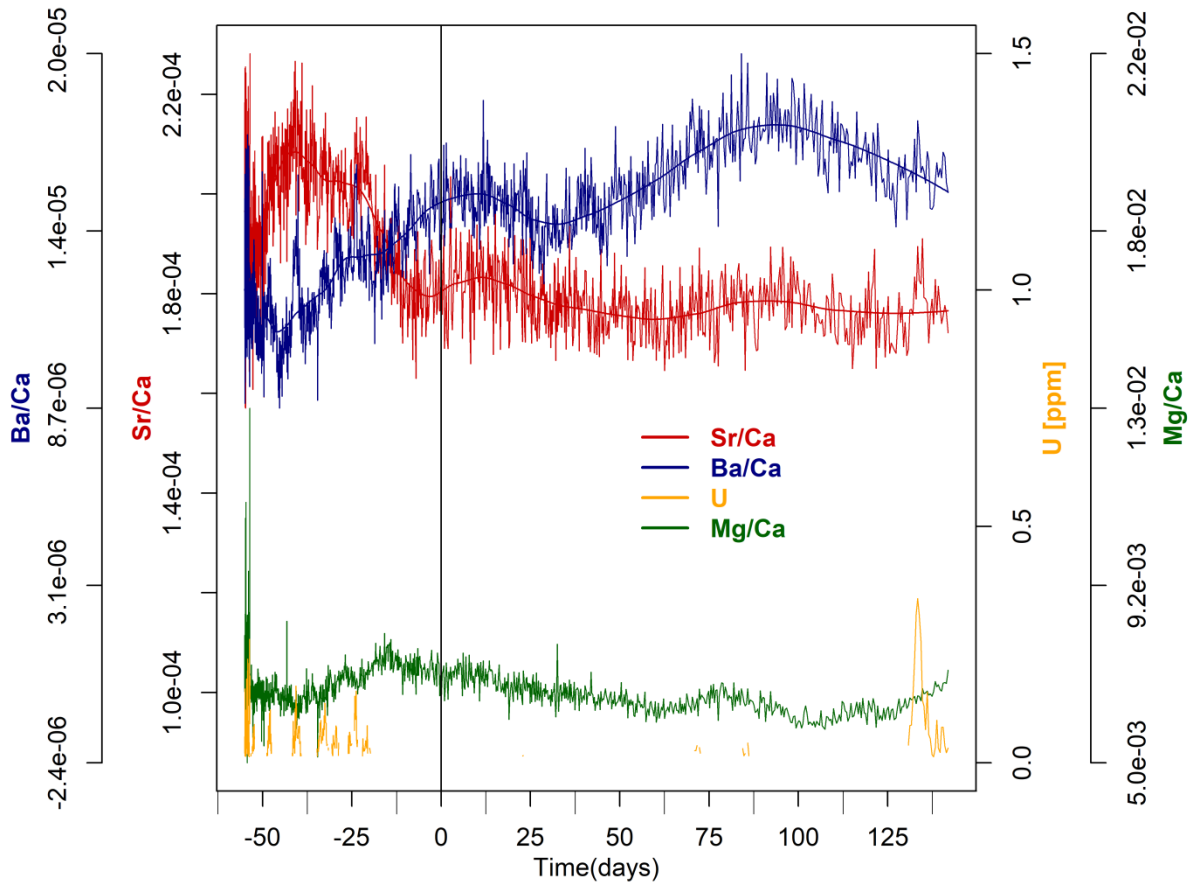

561

562

563 **Figure S9. Time-resolved Sr/Ca, Ba/Ca, Mg/Ca and [U] profiles Nadale 1 deciduous**  
 564 **teeth.** The elemental profiles were analyzed within enamel closest to the enamel-dentine-  
 565 junction (EDJ).

566

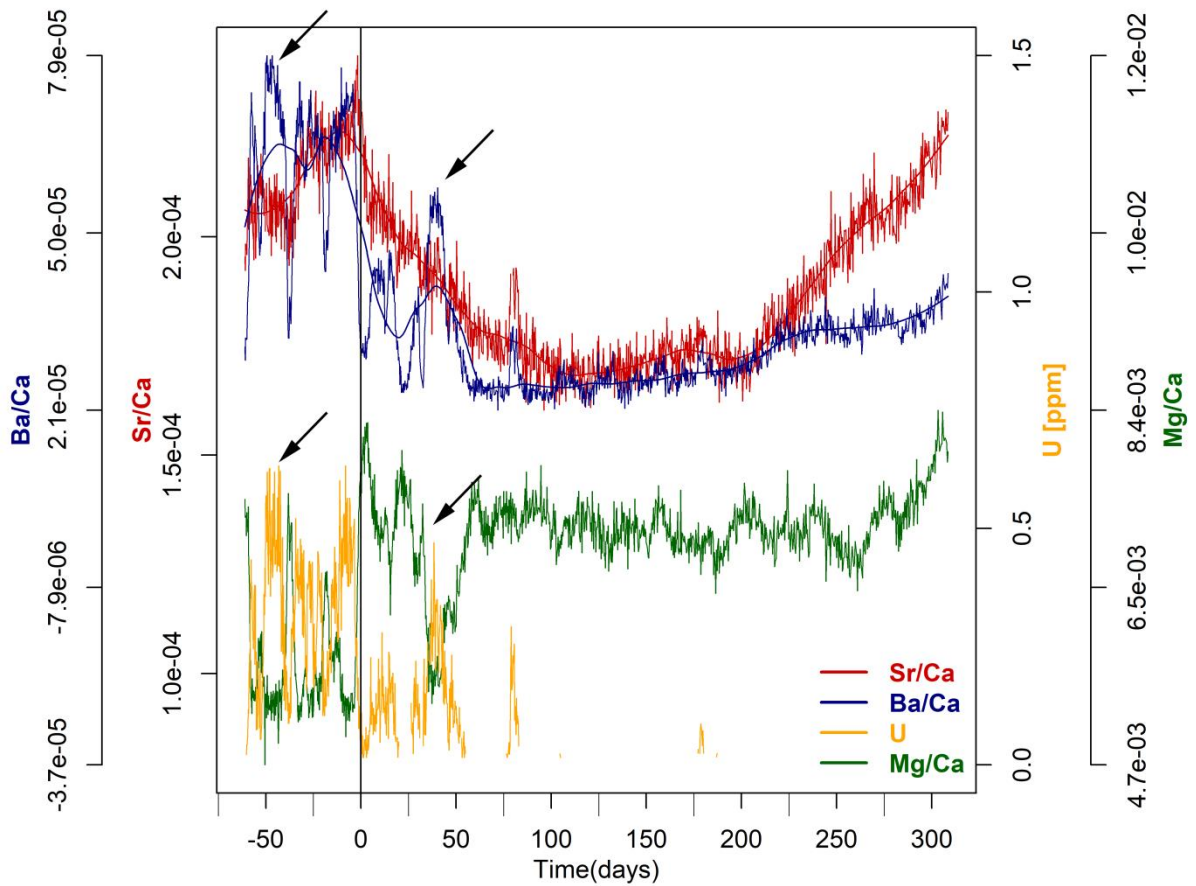

567

568 **Figure S10. Time-resolved Sr/Ca, Ba/Ca, Mg/Ca and [U] profiles Fumane 1**  
 569 **deciduous teeth.** The elemental profiles were analyzed within enamel closest to the  
 570 enamel-dentine-junction (EDJ); While Sr seems only partly affected by this overprint, Ba  
 571 tends to precisely resemble the small-scale chemical fluctuations of the diagenetic proxies  
 572 (i.e. U). The anticorrelation between U and Mg/Ca indicates a loss Mg during the post-  
 573 burial history, and the likely precipitation of low-Mg phases. Black arrows highlight the  
 574 worst diagenetically-affected domains of the enamel.

575

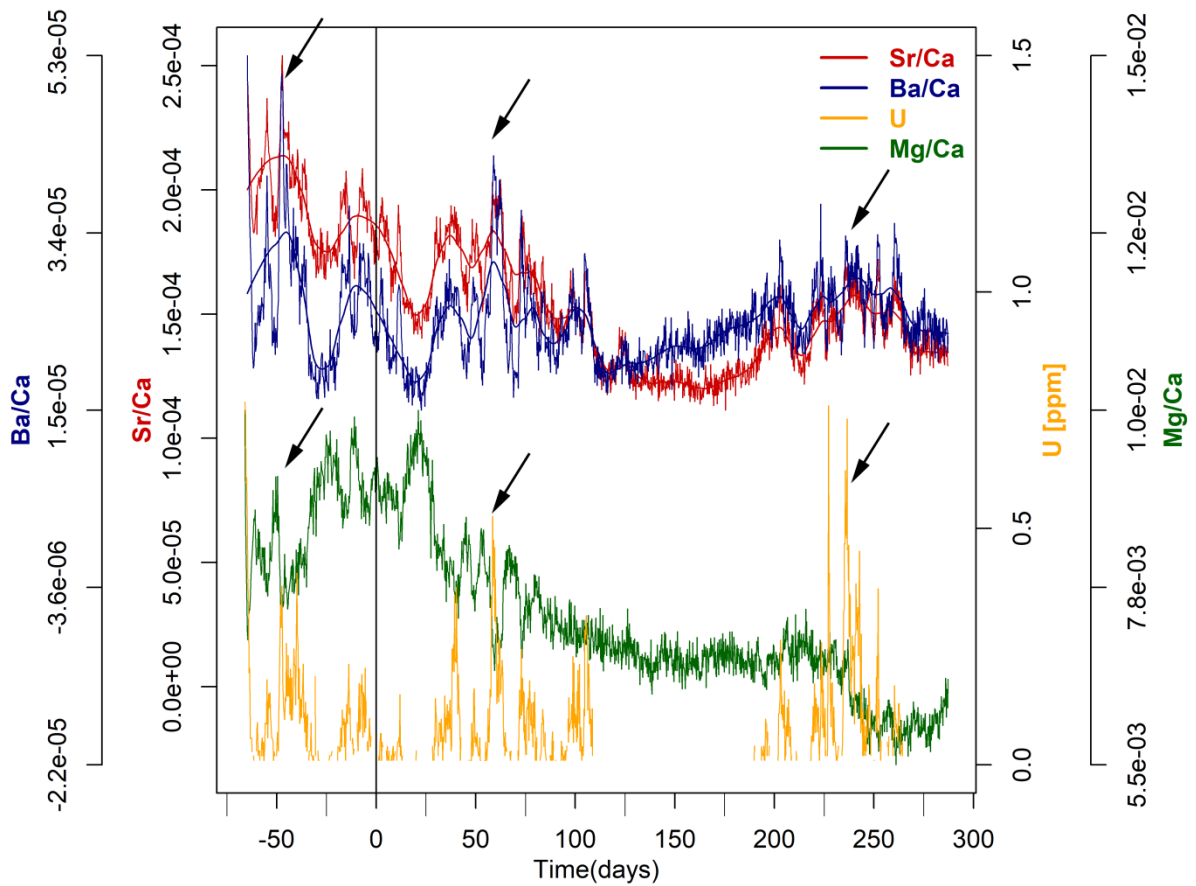

576

577 **Figure S11. Time-resolved Sr/Ca, Ba/Ca, Mg/Ca and [U] profiles Riparo Broion 1**  
 578 **deciduous teeth.** The elemental profiles were analyzed within enamel closest to the  
 579 enamel-dentine-junction (EDJ); While Sr seems only partly affected by this overprint, Ba  
 580 tends to precisely resemble the small-scale chemical fluctuations of the diagenetic proxies  
 581 (i.e. U). The anticorrelation between U and Mg/Ca indicates a loss Mg during the post-  
 582 burial history, and the likely precipitation of low-Mg phases. Black arrows highlight the  
 583 worst diagenetically-affected domains of the enamel.

584

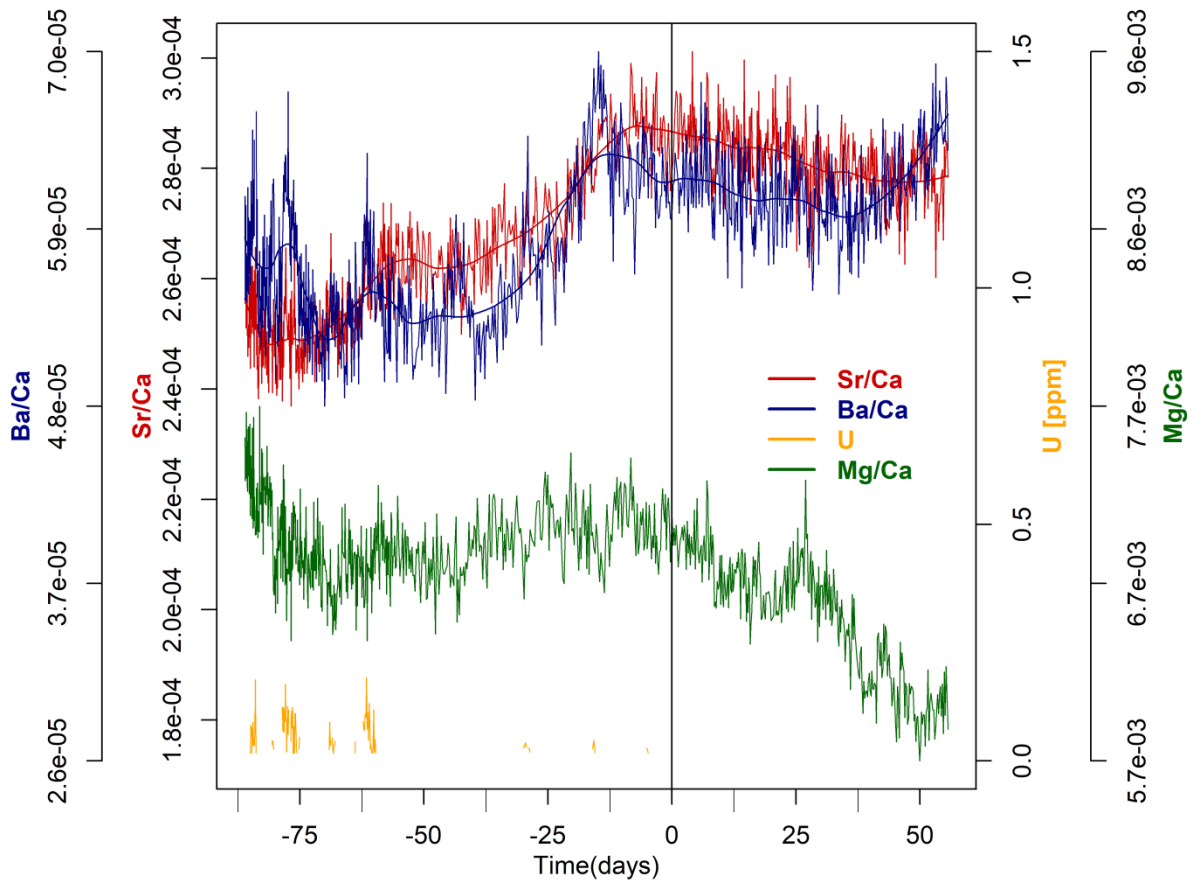

585

586 **Figure S12. Time-resolved Sr/Ca, Ba/Ca, Mg/Ca and [U] profiles Fumane 2**  
 587 **deciduous tooth.** The elemental profiles were analyzed within enamel closest to the  
 588 enamel-dentine-junction (EDJ).

589

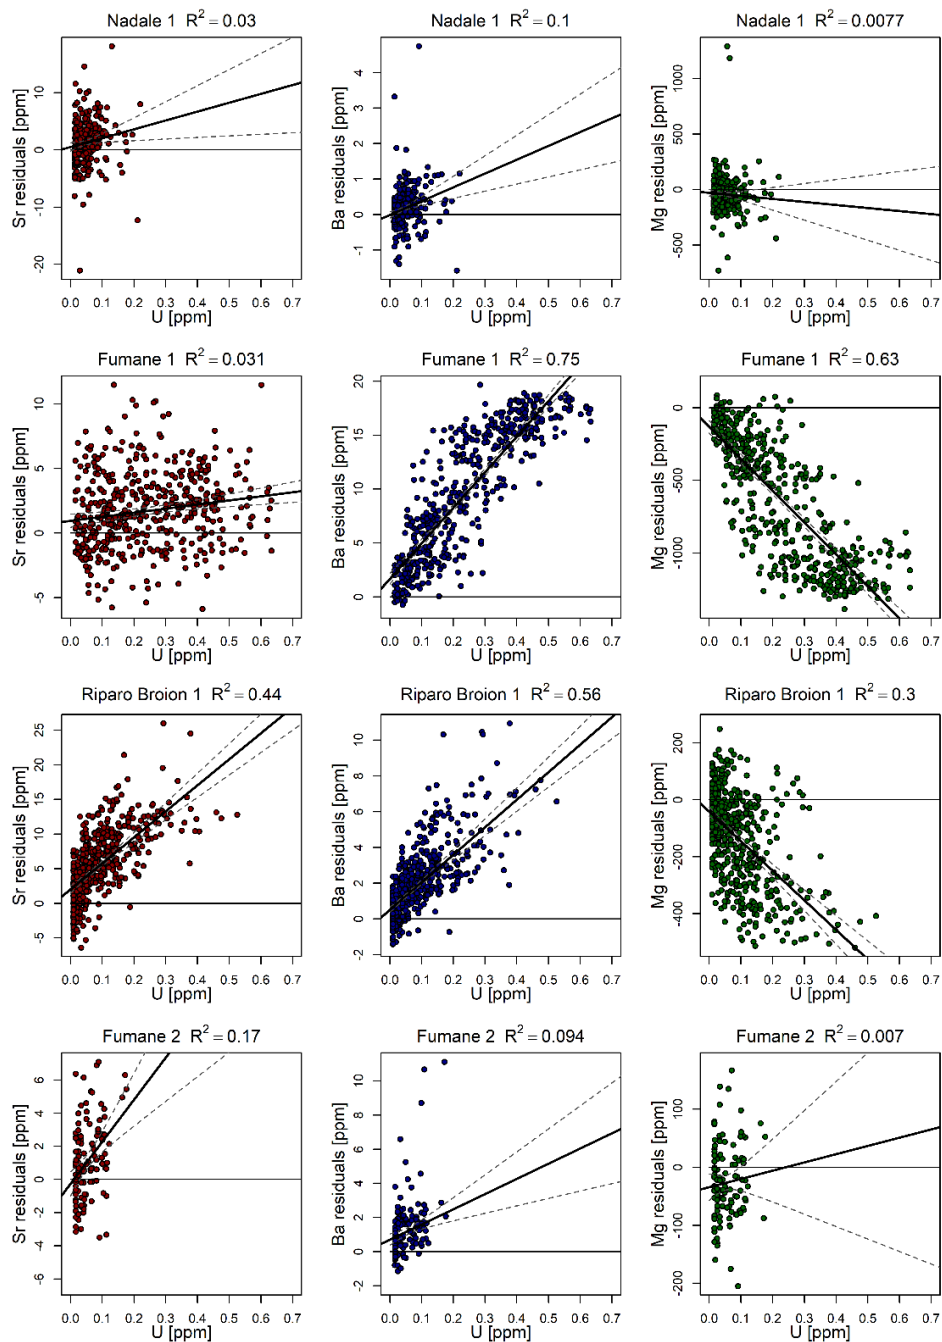

590

591 **Fig. S13: Scatter plots of U vs. the residuals of Sr, Ba or Mg variation for the**  
 592 **diagenetically most affected segments in Nadale 1 (start till -10days), Fumane 1**  
 593 **(start till 100 days), Riparo Broion 1(start till 125 days) and Fumane 2 (start till -50**  
 594 **days).** Residuals were derived from the smoothed elemental profiles of Fig. 3e, calculated  
 595 with a local polynomial regression fitting - LOWESS (78) - on the laser path portions  
 596 with  $U \leq \text{LOD}$ . The residual Sr, Ba, Mg variability rather all data were used as we wanted  
 597 as much as possible remove biological variation overprint any diagenesis signal.



**Table S1:** Sr isotopes of local rodent teeth by MC-ICPMS

| Site             | Local geology                             | Rodent species              | Sample type                           | $^{87}\text{Sr}/^{86}\text{Sr}$ | 2 S.E.         |
|------------------|-------------------------------------------|-----------------------------|---------------------------------------|---------------------------------|----------------|
| Nadale           | Eocene limestone                          | <i>Microtinae</i><br>indet. | enamel                                | 0.70847                         | 0.00001        |
|                  |                                           |                             | enamel                                | 0.70843                         | 0.00001        |
|                  |                                           |                             | enamel                                | 0.70825                         | 0.00003        |
|                  |                                           |                             | enamel                                | 0.70864                         | 0.00001        |
|                  |                                           |                             | enamel                                | 0.70857                         | 0.00001        |
|                  |                                           |                             | <b>mean (<math>\pm</math> 2 S.D.)</b> | <b>0.70847</b>                  | <b>0.00030</b> |
| Riparo<br>Broion | Eocene Oligocene<br>limestone             | <i>Microtinae</i><br>indet. | whole tooth                           | 0.70826                         | 0.00001        |
|                  |                                           |                             | whole tooth                           | 0.70820                         | 0.00001        |
|                  |                                           |                             | whole tooth                           | 0.70814                         | 0.00001        |
|                  |                                           |                             | whole tooth                           | 0.70827                         | 0.00001        |
|                  |                                           |                             | whole tooth                           | 0.70838                         | 0.00001        |
|                  |                                           |                             | <b>mean (<math>\pm</math> 2 S.D.)</b> | <b>0.70825</b>                  | <b>0.00018</b> |
| Fumane Cave      | Jurassic-Cretaceous<br>limestone and marl | <i>Microtinae</i><br>indet. | enamel                                | 0.70948                         | 0.00001        |
|                  |                                           |                             | enamel                                | 0.70937                         | 0.00001        |
|                  |                                           |                             | enamel                                | 0.70947                         | 0.00001        |
|                  |                                           |                             | enamel                                | 0.70940                         | 0.00001        |
|                  |                                           |                             | enamel                                | 0.70962                         | 0.00001        |
|                  |                                           |                             | enamel                                | 0.70958                         | 0.00001        |
|                  |                                           |                             | <b>mean (<math>\pm</math> 2 S.D.)</b> | <b>0.70948</b>                  | <b>0.00020</b> |

598

599

600 **Table S2.** Discrimination factors of Sr over Ca within mother and infant bodies; fluxes  
 601 through different tissues are reported in brackets; a Sr/Ca relative to a mother diet equal  
 602 to 1 has been calculated for each end-member; the different enamel portions where a  
 603 specific signal is fixed are also reported.

| End-member (flux)                            | (Sr-over-Ca discrimination factor)                                                     | Relative Sr/Ca | Reference              | Enamel                        |
|----------------------------------------------|----------------------------------------------------------------------------------------|----------------|------------------------|-------------------------------|
| Diet                                         | -                                                                                      | <b>1</b>       | -                      | -                             |
| Mother sera (diet-blood)                     | 0.30 ± 0.08*                                                                           | <b>0.3</b>     | Balter, 2004           | -                             |
| Umbilical cord sera (mother sera - placenta) | 0.6                                                                                    | <b>0.18</b>    | ICRP, 2004             | prenatal                      |
| Breastmilk (mother sera - mammary gland)     | 0.4                                                                                    | <b>0.12</b>    | ICRP, 2004             | postnatal, breast-fed infant  |
| Animal milk                                  | One trophic level lower than human breastmilk (Sr/Ca ~3.3-fold higher than human milk) | <b>0.40</b>    | Balter, 2004; see text | postnatal, formula-fed infant |

\*this value is relative to the difference between mammals' muscle (or bone) tissue and their diet, based on a large trophic chain study; for simplicity any eventual discrimination between blood and muscles (or bones) is ignored.

604

605

606 **Table S3.** Ba, Sr, Ca, Ba/Ca and Sr/Ca values of umbilical cord sera, breast-fed infant  
 607 sera and formula-fed infant sera from (52, 55). Values are reported as mean  $\pm$  sd.

| Elemental contents and ratios          | Maternal sera <sup>a</sup> | Umbilical cord sera <sup>b</sup> | Umbilical cord sera <sup>a</sup> | Breast-fed infant (ca. 3 months) sera <sup>b</sup> | Formula-fed infant (ca. 3 months) sera <sup>b</sup> | Colostrum <sup>a</sup> |
|----------------------------------------|----------------------------|----------------------------------|----------------------------------|----------------------------------------------------|-----------------------------------------------------|------------------------|
| <b>Ba (<math>\mu\text{g/L}</math>)</b> | 6 $\pm$ 7.8                | 0.8 $\pm$ 0.8                    | 1.5 $\pm$ 1.7                    | 1.9 $\pm$ 0.4                                      | 3.8 $\pm$ 1.4                                       | 10.6 $\pm$ 8.7         |
| <b>Sr (<math>\mu\text{g/L}</math>)</b> | 22.3 $\pm$ 8.9             | 20 $\pm$ 9                       | 19.6 $\pm$ 7.2                   | 12 $\pm$ 3                                         | 40 $\pm$ 25                                         | 37 $\pm$ 18            |
| <b>Ca (mg/L)</b>                       | 92 $\pm$ 16                | 95 $\pm$ 13                      | 104 $\pm$ 16                     | 112 $\pm$ 4                                        | 116 $\pm$ 8                                         | 210 $\pm$ 60           |
| <b>Ba/Ca*10<sup>3</sup></b>            | 0.082 $\pm$ 0.099          | 0.010 $\pm$ 0.010                | 0.017 $\pm$ 0.019                | 0.017 $\pm$ 0.004                                  | 0.034 $\pm$ 0.014                                   | 0.068 $\pm$ 0.061      |
| <b>Sr/Ca*10<sup>3</sup></b>            | 0.267 $\pm$ 0.143          | 0.228 $\pm$ 0.126                | 0.204 $\pm$ 0.101                | 0.108 $\pm$ 0.031                                  | 0.361 $\pm$ 0.240                                   | 0.219 $\pm$ 0.148      |

<sup>a</sup>Krachler et al. (1999, *European Journal of Clinical Nutrition*); <sup>b</sup>Krachler et al. (1999, *Biological Trace Element Research*).

608

609

610 **Legends for Datasets**

611

612 **Dataset S1.**  $^{87}\text{Sr}/^{86}\text{Sr}$ ,  $^{84}\text{Sr}/^{86}\text{Sr}$  and  $^{85}\text{Rb}/^{86}\text{Sr}$  data of Middle-Upper Paleolithic deciduous  
613 teeth (baseline, interference, mass-bias/elemental-fractionation-corrected (see text); very  
614 minor offset of  $^{84}\text{Sr}/^{86}\text{Sr}$  from 0.0565 is due to residual variability of  $^{84}\text{Kr}$ -backgrounds  
615 for protracted profile analyses).

616

617 **Dataset S2.** Sr/Ca and Ba/Ca data of modern reference deciduous teeth.

618

619 **Dataset S3.** Sr/Ca, Ba/Ca, Mg/Ca and [U] data of Middle-Upper Paleolithic deciduous  
620 teeth (LOD indicates that [U]<limit of detection).

621

622 **SI References**

623

- 624 1. Benazzi S, *et al.* (2014) Middle Paleolithic and Uluzzian human remains from  
625 Fumane Cave, Italy. *Journal of Human Evolution* 70:61-68.
- 626 2. Arnaud J, *et al.* (2017) A Neanderthal deciduous human molar with incipient  
627 carious infection from the Middle Palaeolithic De Nadale cave, Italy. *American*  
628 *Journal of Physical Anthropology* 162(2):370-376.
- 629 3. Benazzi S, *et al.* (2015) The makers of the Protoaurignacian and implications for  
630 Neandertal extinction. *Science* 348(6236):793-796.
- 631 4. AlQahtani SJ, Hector M, & Liversidge H (2010) Brief communication: the  
632 London atlas of human tooth development and eruption. *American Journal of*  
633 *Physical Anthropology* 142(3):481-490.
- 634 5. Jequier CA, *et al.* (2015) The De Nadale Cave, a single layered Quina Mousterian  
635 site in the North of Italy. *Quartär* 62 (2015): 7-21.
- 636 6. Livraghi A, Fanfarillo G, Dal Colle M, Romandini M, & Peresani M (2019)  
637 Neanderthal ecology and the exploitation of cervids and bovids at the onset of  
638 MIS4: A study on De Nadale cave, Italy. *Quaternary International*.
- 639 7. Terlato G, Livraghi A, Romandini M, & Peresani M (2019) Large bovids on the  
640 Neanderthal menu: Exploitation of *Bison priscus* and *Bos primigenius* in  
641 northeastern Italy. *Journal of Archaeological Science: Reports* 25:129-143.
- 642 8. López-García JM, Livraghi A, Romandini M, & Peresani M (2018) The De  
643 Nadale Cave (Zovencedo, Berici Hills, northeastern Italy): A small-mammal  
644 fauna from near the onset of Marine Isotope Stage 4 and its palaeoclimatic  
645 implications. *Palaeogeography, Palaeoclimatology, Palaeoecology* 506:196-201.
- 646 9. Martellotta E, Livraghi A, & Peresani M (in press) Bone retouchers from the  
647 Mousterian Quina site of De Nadale Cave (Berici Hills, north-eastern Italy).  
648 *Comptes Rendu Palevol*.
- 649 10. Broglio A, Cilli C, Giacobini G, & Gurioli F (2006) Osso, palco, dente e  
650 conchiglia: i supporti in materia dura animale dei manufatti dei primi uomini  
651 moderni a Fumane (Verona). *XXXIX Riunione Scientifica Istituto Italiano*  
652 *Preistoria e Protostoria" Materie prime e scambi nella preistoria italiana"*,  
653 (Istituto Italiano Preistoria e Protostoria), pp 815-827.
- 654 11. Peresani M (2012) Fifty thousand years of flint knapping and tool shaping across  
655 the Mousterian and Uluzzian sequence of Fumane cave. *Quaternary International*  
656 247:125-150.
- 657 12. Peresani M, Cristiani E, & Romandini M (2016) The Uluzzian technology of  
658 Grotta di Fumane and its implication for reconstructing cultural dynamics in the  
659 Middle–Upper Palaeolithic transition of Western Eurasia. *Journal of Human*  
660 *Evolution* 91:36-56.
- 661 13. Peresani M, *et al.* (2008) Age of the final Middle Palaeolithic and Uluzzian levels  
662 at Fumane Cave, Northern Italy, using <sup>14</sup>C, ESR, <sup>234</sup>U/<sup>230</sup>Th and  
663 thermoluminescence methods. *Journal of Archaeological Science* 35(11):2986-  
664 2996.

- 665 14. Higham T, *et al.* (2009) Problems with radiocarbon dating the Middle to Upper  
666 Palaeolithic transition in Italy. *Quaternary Science Reviews* 28(13-14):1257-1267.
- 667 15. López-García JM, dalla Valle C, Cremaschi M, & Peresani M (2015)  
668 Reconstruction of the Neanderthal and Modern Human landscape and climate  
669 from the Fumane cave sequence (Verona, Italy) using small-mammal  
670 assemblages. *Quaternary Science Reviews* 128:1-13.
- 671 16. Fiore I, Gala M, & Tagliacozzo A (2004) Ecology and subsistence strategies in  
672 the Eastern Italian Alps during the Middle Palaeolithic. *International Journal of*  
673 *Osteoarchaeology* 14(3-4):273-286.
- 674 17. Falcucci A, Conard NJ, & Peresani M (2017) A critical assessment of the  
675 Protoaurignacian lithic technology at Fumane Cave and its implications for the  
676 definition of the earliest Aurignacian. *PloS one* 12(12).
- 677 18. Falcucci A, Peresani M, Roussel M, Normand C, & Soressi M (2018) What’s the  
678 point? Retouched bladelet variability in the Protoaurignacian. Results from  
679 Fumane, Isturitz, and Les Cottés. *Archaeological and Anthropological Sciences*  
680 10(3):539-554.
- 681 19. Peresani M, *et al.* (2019) Marine and freshwater shell exploitation in the Early  
682 Upper Palaeolithic. Re-examination of the assemblages from Fumane Cave (NE  
683 Italy). *PaleoAnthropology* 2019, 64–81
- 684 20. Cavallo G, *et al.* (2018) Heat Treatment of Mineral Pigment During the Upper  
685 Palaeolithic in North-East Italy. *Archaeometry* 60(5):1045-1061.
- 686 21. Peretto C, Biagi P, Boschian G, & Broglio A (2004) Living-floors and structures  
687 from the Lower Paleolithic to the Bronze Age in Italy. *Collegium Antropologicum*  
688 28(1):63-88.
- 689 22. Broglio A, *et al.* (2003) L’Aurignacien dans le territoire préalpin: la Grotte de  
690 Fumane. *XIV UISPP Congress*, (British Archaeological Reports), pp 93-104.
- 691 23. Cassoli P & Tagliacozzo A (1994) Considerazioni paleontologiche,  
692 paleoecologiche e archeozoologiche sui macromammiferi e gli uccelli dei livelli  
693 del Pleistocene superiore del Riparo di Fumane (VR) scavi 1988–91. *Bollettino*  
694 *del Museo civico di Storia Naturale di Verona* 18:349-445.
- 695 24. Broglio A, Bertola S, De Stefani M, & Gurioli F (2009) “The shouldered points of  
696 the Early Epigravettian of the Berici Hills (Venetian Region–North Italy).  
697 Materials, Blanks, Typology, Exploitation” in *Understanding the Past. Papers*  
698 *offered to Stefan K. Kozłowski. Center for Research on the Antiquity of*  
699 *Southeastern Europe. University of Warsaw, Warsaw: 59-68.*
- 700 25. Sauro U (2002) The Monti Berici: a peculiar type of karst in the Southern Alps.  
701 *Acta Carsologica* 31(3):99-114.
- 702 26. Dal Lago A & Mietto P (2003) Grotte dei Berici. *Aspetti fisici e naturalistici.*  
703 *Museo Naturalistico Archeologico, Vicenza.*
- 704 27. Peresani M & Porraz G (2004) Ré-interprétation et mise en valeur des niveaux  
705 moustériens de la Grotte du Broion (Monti Berici, Vénétie). *Etude techno-*  
706 *économique des industries lithiques.*
- 707 28. Romandini M, Bertola S, & Nannini N (2015) Nuovi dati sul Paleolitico dei Colli  
708 Berici: risultati preliminari dello studio archeozoologico e delle materie prime  
709 litiche della Grotta del Buso Doppio del Broion (Lumignano, Longare, Vicenza).

- 710 *Nuovi dati sul Paleolitico dei Colli Berici: risultati preliminari dello studio*  
711 *archeozoologico e delle materie prime litiche della Grotta del Buso Doppio del*  
712 *Broion (Lumignano, Longare, Vicenza):53-59.*
- 713 29. De Stefani M, Gurioli F, & Ziggotti S (2005) Il Paleolitico superiore del Riparo  
714 del Broion nei Colli Berici (Vicenza). *Il Paleolitico superiore del Riparo del*  
715 *Broion nei Colli Berici (Vicenza):93-108.*
- 716 30. Peresani M, Bertola S, Delpiano D, Benazzi S, & Romandini M (2019) The  
717 Uluzzian in the north of Italy: insights around the new evidence at Riparo Broion.  
718 *Archaeological and Anthropological Sciences* 11(7):3503-3536.
- 719 31. Romandini M, *et al.* (2020) A late Neanderthal tooth from northeastern Italy.  
720 *Journal of Human Evolution* 147, 102867.
- 721 32. Vescovi E, *et al.* (2007) Interactions between climate and vegetation on the  
722 southern side of the Alps and adjacent areas during the Late-glacial period as  
723 recorded by lake and mire sediment archives. *Quaternary Science Reviews*  
724 26:1650-1669.
- 725 33. Badino F, *et al.* (2019) An overview of Alpine and Mediterranean  
726 palaeogeography, terrestrial ecosystems and climate history during MIS 3 with  
727 focus on the Middle to Upper Palaeolithic transition. *Quaternary International*.
- 728 34. Pini R, Ravazzi C, & Reimer P (2010) The vegetation and climate history of the  
729 last glacial cycle in a new pollen record from Lake Fimon (southern Alpine  
730 foreland, N-Italy). *Quaternary Science Reviews* 29(23-24):3115-3137.
- 731 35. Shannon R (1976) Revised effective ionic radii and systematic studies of  
732 interatomic distances in halides and chalcogenides. *Acta crystallographica section*  
733 *A: crystal physics, diffraction, theoretical and general crystallography* 32(5):751-  
734 767.
- 735 36. Burton JH, Price TD, & Middleton WD (1999) Correlation of bone Ba/Ca and  
736 Sr/Ca due to biological purification of calcium. *Journal of Archaeological*  
737 *Sciences* 26(6):609-616.
- 738 37. Elias RW, Hirao Y, & Patterson CC (1982) The Circumvention of the Natural  
739 Biopurification of Calcium along Nutrient Pathways by Atmospheric Inputs of  
740 Industrial Lead. *Geochimica et Cosmochimica Acta* 46(12):2561-2580.
- 741 38. Balter V (2004) Allometric constraints on Sr/Ca and Ba/Ca partitioning in  
742 terrestrial mammalian trophic chains. *Oecologia* 139(1):83-88.
- 743 39. Dahl S, *et al.* (2001) Incorporation and distribution of strontium in bone. *Bone*  
744 28(4):446-453.
- 745 40. Kshirsagar S, Lloyd E, & Vaughan J (1966) Discrimination between strontium  
746 and calcium in bone and the transfer from blood to bone in the rabbit. *The British*  
747 *Journal of Radiology* 39(458):131-140.
- 748 41. Burton JH & Wright LE (1995) Nonlinearity in the relationship between bone  
749 Sr/Ca and diet: paleodietary implications. *American Journal of Physical*  
750 *Anthropology* 96(3):273-282.
- 751 42. Price TD, Swick RW, & Chase EP (1986) Bone chemistry and prehistoric diet:  
752 strontium studies of laboratory rats. *American Journal of Physical Anthropology*  
753 70(3):365-375.

- 754 43. Gilbert C, Sealy J, & Sillen A (1994) An investigation of barium, calcium and  
755 strontium as palaeodietary indicators in the Southwestern Cape, South Africa.  
756 *Journal of Archaeological Science* 21(2):173-184.
- 757 44. Rivera J & Harley JH (1965) The HASL Bone Program, 1961-1964. (Health and  
758 Safety Lab., New York Operations Office (AEC), NY).
- 759 45. Sillen A & Smith P (1984) Weaning patterns are reflected in strontium-calcium  
760 ratios of juvenile skeletons. *Journal of Archaeological Science* 11(3):237-245.
- 761 46. Lough S, Rivera J, & Comar C (1963) Retention of strontium, calcium, and  
762 phosphorus in human infants. *Proceedings of the Society for Experimental*  
763 *Biology and Medicine* 112(3):631-636.
- 764 47. Rossipal E, Krachler M, Li F, & Micetic-Turk D (2000) Investigation of the  
765 transport of trace elements across barriers in humans: studies of placental and  
766 mammary transfer. *Acta Paediatrica* 89(10):1190-1195.
- 767 48. ICRP (2004) Doses to infants from ingestion of radionuclides in mother's milk.  
768 *ICRP Publication 95. Ann. ICRP* 34(3-4).
- 769 49. Humphrey LT, Dean MC, Jeffries TE, & Penn M (2008) Unlocking evidence of  
770 early diet from tooth enamel. *Proceedings of the National Academy of Sciences of*  
771 *the United States of America* 105(19):6834-6839.
- 772 50. Müller W, *et al.* (2019) Enamel mineralization and compositional time-resolution  
773 in human teeth evaluated via histologically-defined LA-ICPMS profiles.  
774 *Geochimica et Cosmochimica Acta* 255:105-126.
- 775 51. Humphrey LT, Dirks W, Dean MC, & Jeffries TE (2008) Tracking dietary  
776 transitions in weanling baboons (*Papio hamadryas anubis*) using  
777 strontium/calcium ratios in enamel. *Folia Primatologica* 79(4):197-212.
- 778 52. Krachler M, Rossipal E, & Micetic-Turk D (1999) Concentrations of trace  
779 elements in sera of newborns, young infants, and adults. *Biological trace element*  
780 *research* 68(2):121.
- 781 53. Peek S & Clementz MT (2012) Sr/Ca and Ba/Ca variations in environmental and  
782 biological sources: a survey of marine and terrestrial systems. *Geochimica et*  
783 *Cosmochimica Acta* 95:36-52.
- 784 54. Austin C, *et al.* (2013) Barium distributions in teeth reveal early-life dietary  
785 transitions in primates. *Nature* 498(7453):216-219.
- 786 55. Krachler M, Rossipal E, & Micetic-Turk D (1999) Trace element transfer from  
787 the mother to the newborn—investigations on triplets of colostrum, maternal and  
788 umbilical cord sera. *European Journal of Clinical Nutrition* 53(6):486-494.
- 789 56. Dean MC, Spiers KM, Garrevoet J, & Le Cabec A (2019) Synchrotron X-ray  
790 fluorescence mapping of Ca, Sr and Zn at the neonatal line in human deciduous  
791 teeth reflects changing perinatal physiology. *Archives of Oral Biology* 104:90-  
792 102.
- 793 57. Matos C, Moutinho C, Almeida C, Guerra A, & Balcão V (2014) Trace element  
794 compositional changes in human milk during the first four months of lactation.  
795 *International Journal of Food Sciences and Nutrition* 65(5):547-551.
- 796 58. Metcalfe JZ, Longstaffe FJ, & Zazula GD (2010) Nursing, weaning, and tooth  
797 development in woolly mammoths from Old Crow, Yukon, Canada: implications



- 798 for Pleistocene extinctions. *Palaeogeography, Palaeoclimatology, Palaeoecology*  
799 298(3-4):257-270.
- 800 59. Tacail T, Kovačiková L, Brůžek J, & Balter V (2017) Spatial distribution of trace  
801 element Ca-normalized ratios in primary and permanent human tooth enamel.  
802 *Science of the Total Environment* 603:308-318.
- 803 60. Taylor D, Bligh P, & Duggan MH (1962) The absorption of calcium, strontium,  
804 barium and radium from the gastrointestinal tract of the rat. *Biochemical Journal*  
805 83(1):25.
- 806 61. Gillespie B, d'Arcy H, Schwartz K, Bobo JK, & Foxman B (2006) Recall of age  
807 of weaning and other breastfeeding variables. *International Breastfeeding Journal*  
808 1:4-4.
- 809 62. Hoppe KA, Koch PL, & Furutani TT (2003) Assessing the preservation of  
810 biogenic strontium in fossil bones and tooth enamel. *International Journal of*  
811 *Osteoarchaeology* 13(1-2):20-28.
- 812 63. Hinz EA & Kohn MJ (2010) The effect of tissue structure and soil chemistry on  
813 trace element uptake in fossils. *Geochimica et Cosmochimica Acta* 74(11):3213-  
814 3231.
- 815 64. Radosevich SC (1993) The Six Deadly Sins of Trace Element Analysis: A Case of  
816 Wishful Thinking in Science. *Investigations of Ancient Human Tissue: Chemical*  
817 *Analyses in Anthropology*, ed Sandford MK (Gordon and Breach), pp 269-332.
- 818 65. Kohn MJ & Moses RJ (2013) Trace element diffusivities in bone rule out simple  
819 diffusive uptake during fossilization but explain in vivo uptake and release.  
820 *Proceedings of the National Academy of Sciences of the United States of America*  
821 110(2):419-424.
- 822 66. Reynard B & Balter V (2014) Trace elements and their isotopes in bones and  
823 teeth: diet, environments, diagenesis, and dating of archeological and  
824 paleontological samples. *Palaeogeography, Palaeoclimatology, Palaeoecology*  
825 416:4-16.
- 826 67. Millard AR & Hedges REM (1996) A diffusion-adsorption model of uranium  
827 uptake by archaeological bone. *Geochimica et Cosmochimica Acta* 60(12):2139-  
828 2152.
- 829 68. Krestou A, Xenidis A, & Panias D (2004) Mechanism of aqueous uranium (VI)  
830 uptake by hydroxyapatite. *Minerals Engineering* 17(3):373-381.
- 831 69. Grün R, Aubert M, Joannes-Boyau R, & Moncel M-H (2008) High resolution  
832 analysis of uranium and thorium concentration as well as U-series isotope  
833 distributions in a Neanderthal tooth from Payre (Ardèche, France) using laser  
834 ablation ICP-MS. *Geochimica et Cosmochimica Acta* 72(21):5278-5290.
- 835 70. Trueman CN & Tuross N (2002) Trace elements in recent and fossil bone apatite.  
836 *Reviews in Mineralogy and Geochemistry* 48(1):489-521.
- 837 71. Turner-Walker G & Peacock EE (2008) Preliminary results of bone diagenesis in  
838 Scandinavian bogs. *Palaeogeography, Palaeoclimatology, Palaeoecology* 266(3-  
839 4):151-159.
- 840 72. Kohn MJ, Morris J, and Olin P. (2013) Trace element concentrations in teeth—a  
841 modern Idaho baseline with implications for archeometry, forensics, and  
842 palaeontology. *Journal of Archaeological Science* 40(4):1689-1699.

- 843 73. Ikem A, Nwankwoala A, Oduyungbo S, Nyavor K, & Egiebor N (2002) Levels  
844 of 26 elements in infant formula from USA, UK, and Nigeria by microwave  
845 digestion and ICP–OES. *Food Chemistry* 77(4):439-447.
- 846 74. Bilandžić N, *et al.* (2015) Determination of macro-and microelements in cow,  
847 goat, and human milk using inductively coupled plasma optical emission  
848 spectrometry. *Spectroscopy Letters*, 48(9):677-684.
- 849 75. Björklund KL, *et al.* (2012) Metals and trace element concentrations in breast  
850 milk of first time healthy mothers: a biological monitoring study. *Environmental*  
851 *Health* 11(1):92.
- 852 76. Li C, Solomons NW, Scott ME, & Koski KG (2016) Minerals and trace elements  
853 in human breast milk are associated with Guatemalan infant anthropometric  
854 outcomes within the first 6 months. *The Journal of Nutrition* 146(10):2067-2074.
- 855 77. Friel JK, *et al.* (1999) Elemental composition of human milk from mothers of  
856 premature and full-term infants during the first 3 months of lactation. *Biological*  
857 *Trace Element Research* 67(3):225-247.
- 858 78. Cleveland W, Grosse E, & Shyu W (1992) Local regression models. In ‘Statistical  
859 Models in S’.(Eds JM Chambers, TJ Hastie) pp. 309–376. Chapman & Hall: New  
860 York.  
861
